# Supplementary material for: Potential European Geographical Distribution of Gnathotrichus materiarius (Fitch, 1858) (Coleoptera: Scolytinae) under Current and Future Climate Conditions
Source: MDPI journal article supplement (doi:10.3390/f13071097), 2022-07-12
Supplement: s1 [file s1]

**Supplementary Material** Table S1. Coordinates used to develop the model of the occurrence of *Gnathotrichus materiarius*.

| Number | Country | Data source   | Latitude      | Longitude      |
|--------|---------|---------------|---------------|----------------|
| 1      | U.S.A.  | Atkinson 2018 | 27.9472       | -82.4586       |
| 2      | U.S.A.  | Atkinson 2018 | 28.5997       | -81.3394       |
| 3      | U.S.A.  | Atkinson 2018 | 28.7157       | -81.4775       |
| 4      | U.S.A.  | Atkinson 2018 | 29.3081       | -81.2706       |
| 5      | U.S.A.  | Atkinson 2018 | 29.3911       | -81.6389       |
| 6      | U.S.A.  | Atkinson 2018 | 29.5051       | -82.2749       |
| 7      | U.S.A.  | Atkinson 2018 | 29.5053       | -82.2747       |
| 8      | U.S.A.  | Atkinson 2018 | 29.6407       | -82.3588       |
| 9      | U.S.A.  | Atkinson 2018 | 29.6407       | -82.3588       |
| 10     | U.S.A.  | Atkinson 2018 | 29.6829       | -82.2968       |
| 11     | U.S.A.  | Atkinson 2018 | 29.6838       | -82.2982       |
| 12     | U.S.A.  | Atkinson 2018 | 29.72         | -82.46         |
| 13     | U.S.A.  | Atkinson 2018 | 29.866443     | -95.155834     |
| 14     | U.S.A.  | Atkinson 2018 | 30.115036     | -94.01513      |
| 15     | U.S.A.  | Atkinson 2018 | 30.1744       | -85.6711       |
| 16     | U.S.A.  | Atkinson 2018 | 30.22549      | -95.486386     |
| 17     | U.S.A.  | Atkinson 2018 | 30.2266       | -93.2174       |
| 18     | U.S.A.  | Atkinson 2018 | 30.3450603794 | -90.0842698191 |
| 19     | U.S.A.  | Atkinson 2018 | 30.3705       | -81.4847       |
| 20     | U.S.A.  | Atkinson 2018 | 30.4          | -81.7542       |
| 21     | U.S.A.  | Atkinson 2018 | 30.4221       | -81.5046       |
| 22     | U.S.A.  | Atkinson 2018 | 30.496        | -89.6671       |
| 23     | U.S.A.  | Atkinson 2018 | 30.524        | -90.4239       |
| 24     | U.S.A.  | Atkinson 2018 | 30.5461       | -90.4847       |
| 25     | U.S.A.  | Atkinson 2018 | 30.582        | -86.526        |
| 26     | U.S.A.  | Atkinson 2018 | 30.613809     | -94.408776     |
| 27     | U.S.A.  | Atkinson 2018 | 30.65414      | -93.899124     |
| 28     | U.S.A.  | Atkinson 2018 | 30.65794      | -93.888527     |
| 29     | U.S.A.  | Atkinson 2018 | 30.681979     | -87.893114     |
| 30     | U.S.A.  | Atkinson 2018 | 30.69231      | -94.938484     |
| 31     | U.S.A.  | Atkinson 2018 | 30.770843     | -94.421089     |
| 32     | U.S.A.  | Atkinson 2018 | 30.821384     | -95.245678     |
| 33     | U.S.A.  | Atkinson 2018 | 30.8683       | -90.0031       |
| 34     | U.S.A.  | Atkinson 2018 | 30.911912     | -94.010883     |
| 35     | U.S.A.  | Atkinson 2018 | 30.9743       | -88.528        |
| 36     | U.S.A.  | Atkinson 2018 | 30.990374     | -94.835389     |
| 37     | U.S.A.  | Atkinson 2018 | 31.0306       | -92.5397       |

|    |        |               |           |            |
|----|--------|---------------|-----------|------------|
| 38 | U.S.A. | Atkinson 2018 | 31.0535   | -92.529    |
| 39 | U.S.A. | Atkinson 2018 | 31.0893   | -92.4521   |
| 40 | U.S.A. | Atkinson 2018 | 31.1435   | -93.261    |
| 41 | U.S.A. | Atkinson 2018 | 31.1466   | -92.4974   |
| 42 | U.S.A. | Atkinson 2018 | 31.183936 | -94.855005 |
| 43 | U.S.A. | Atkinson 2018 | 31.245194 | -93.961275 |
| 44 | U.S.A. | Atkinson 2018 | 31.342879 | -93.956345 |
| 45 | U.S.A. | Atkinson 2018 | 31.343999 | -94.742161 |
| 46 | U.S.A. | Atkinson 2018 | 31.39667  | -93.765054 |
| 47 | U.S.A. | Atkinson 2018 | 31.43986  | -94.843548 |
| 48 | U.S.A. | Atkinson 2018 | 31.4764   | -93.0296   |
| 49 | U.S.A. | Atkinson 2018 | 31.5697   | -91.42     |
| 50 | U.S.A. | Atkinson 2018 | 31.6093   | -90.2227   |
| 51 | U.S.A. | Atkinson 2018 | 31.9575   | -91.1995   |
| 52 | U.S.A. | Atkinson 2018 | 32.0965   | -81.1222   |
| 53 | U.S.A. | Atkinson 2018 | 32.1526   | -81.1764   |
| 54 | U.S.A. | Atkinson 2018 | 32.153    | -81.2178   |
| 55 | U.S.A. | Atkinson 2018 | 32.161    | -81.2057   |
| 56 | U.S.A. | Atkinson 2018 | 32.1612   | -81.2051   |
| 57 | U.S.A. | Atkinson 2018 | 32.1746   | -81.2001   |
| 58 | U.S.A. | Atkinson 2018 | 32.2443   | -90.9254   |
| 59 | U.S.A. | Atkinson 2018 | 32.3502   | -90.7002   |
| 60 | U.S.A. | Atkinson 2018 | 32.358    | -90.2094   |
| 61 | U.S.A. | Atkinson 2018 | 32.475581 | -95.295174 |
| 62 | U.S.A. | Atkinson 2018 | 32.53576  | -94.865703 |
| 63 | U.S.A. | Atkinson 2018 | 32.5416   | -93.8473   |
| 64 | U.S.A. | Atkinson 2018 | 32.8412   | -79.872    |
| 65 | U.S.A. | Atkinson 2018 | 32.9096   | -79.9051   |
| 66 | U.S.A. | Atkinson 2018 | 32.9098   | -79.9051   |
| 67 | U.S.A. | Atkinson 2018 | 33.177614 | -87.235517 |
| 68 | U.S.A. | Atkinson 2018 | 33.278091 | -86.807231 |
| 69 | U.S.A. | Atkinson 2018 | 33.3578   | -81.2708   |
| 70 | U.S.A. | Atkinson 2018 | 33.4595   | -80.7353   |
| 71 | U.S.A. | Atkinson 2018 | 33.566117 | -81.720705 |
| 72 | U.S.A. | Atkinson 2018 | 33.6091   | -84.388    |
| 73 | U.S.A. | Atkinson 2018 | 33.6421   | -84.5013   |
| 74 | U.S.A. | Atkinson 2018 | 33.7076   | -84.1273   |
| 75 | U.S.A. | Atkinson 2018 | 33.7489   | -83.4252   |
| 76 | U.S.A. | Atkinson 2018 | 33.7659   | -83.3345   |
| 77 | U.S.A. | Atkinson 2018 | 33.7715   | -84.2264   |
| 78 | U.S.A. | Atkinson 2018 | 33.7716   | -84.5984   |

|     |        |               |           |            |
|-----|--------|---------------|-----------|------------|
| 79  | U.S.A. | Atkinson 2018 | 33.8126   | -83.4594   |
| 80  | U.S.A. | Atkinson 2018 | 33.8528   | -83.5208   |
| 81  | U.S.A. | Atkinson 2018 | 33.8532   | -83.5212   |
| 82  | U.S.A. | Atkinson 2018 | 33.9042   | -83.2443   |
| 83  | U.S.A. | Atkinson 2018 | 33.9061   | -83.2443   |
| 84  | U.S.A. | Atkinson 2018 | 33.9228   | -83.5618   |
| 85  | U.S.A. | Atkinson 2018 | 33.9337   | -81.1067   |
| 86  | U.S.A. | Atkinson 2018 | 33.9397   | -81.0899   |
| 87  | U.S.A. | Atkinson 2018 | 34.001    | -83.384    |
| 88  | U.S.A. | Atkinson 2018 | 34.0018   | -85.1881   |
| 89  | U.S.A. | Atkinson 2018 | 34.107127 | -93.043633 |
| 90  | U.S.A. | Atkinson 2018 | 34.1143   | -80.8947   |
| 91  | U.S.A. | Atkinson 2018 | 34.1239   | -83.3108   |
| 92  | U.S.A. | Atkinson 2018 | 34.1339   | -83.5664   |
| 93  | U.S.A. | Atkinson 2018 | 34.1489   | -83.6602   |
| 94  | U.S.A. | Atkinson 2018 | 34.1783   | -77.9498   |
| 95  | U.S.A. | Atkinson 2018 | 34.2039   | -83.4572   |
| 96  | U.S.A. | Atkinson 2018 | 34.3325   | -82.9275   |
| 97  | U.S.A. | Atkinson 2018 | 34.5084   | -77.5051   |
| 98  | U.S.A. | Atkinson 2018 | 34.6833   | -82.8375   |
| 99  | U.S.A. | Atkinson 2018 | 34.708772 | -92.313014 |
| 100 | U.S.A. | Atkinson 2018 | 34.7319   | -83.9172   |
| 101 | U.S.A. | Atkinson 2018 | 34.7402   | -82.4309   |
| 102 | U.S.A. | Atkinson 2018 | 34.7828   | -84.7092   |
| 103 | U.S.A. | Atkinson 2018 | 34.7969   | -80.4161   |
| 104 | U.S.A. | Atkinson 2018 | 34.827939 | -87.295215 |
| 105 | U.S.A. | Atkinson 2018 | 34.856    | -83.785    |
| 106 | U.S.A. | Atkinson 2018 | 34.8817   | -83.4024   |
| 107 | U.S.A. | Atkinson 2018 | 34.9101   | -80.9884   |
| 108 | U.S.A. | Atkinson 2018 | 34.9601   | -95.08     |
| 109 | U.S.A. | Atkinson 2018 | 34.9888   | -89.9425   |
| 110 | U.S.A. | Atkinson 2018 | 35.2204   | -77.1196   |
| 111 | U.S.A. | Atkinson 2018 | 35.2359   | -80.9273   |
| 112 | U.S.A. | Atkinson 2018 | 35.26     | -78.0299   |
| 113 | U.S.A. | Atkinson 2018 | 35.3281   | -77.6064   |
| 114 | U.S.A. | Atkinson 2018 | 35.4159   | -82.5624   |
| 115 | U.S.A. | Atkinson 2018 | 35.4163   | -82.562    |
| 116 | U.S.A. | Atkinson 2018 | 35.866    | -78.8137   |
| 117 | U.S.A. | Atkinson 2018 | 35.8968   | -78.7578   |
| 118 | U.S.A. | Atkinson 2018 | 36.1043   | -79.966    |
| 119 | U.S.A. | Atkinson 2018 | 36.57828  | -79.859822 |

|     |        |               |           |            |
|-----|--------|---------------|-----------|------------|
| 120 | U.S.A. | Atkinson 2018 | 36.643071 | -80.147775 |
| 121 | U.S.A. | Atkinson 2018 | 36.8656   | -87.4886   |
| 122 | U.S.A. | Atkinson 2018 | 36.9903   | -86.4436   |
| 123 | U.S.A. | Atkinson 2018 | 37.0334   | -88.35     |
| 124 | U.S.A. | Atkinson 2018 | 37.0439   | -94.6364   |
| 125 | U.S.A. | Atkinson 2018 | 37.1454   | -84.1698   |
| 126 | U.S.A. | Atkinson 2018 | 37.198638 | -76.553061 |
| 127 | U.S.A. | Atkinson 2018 | 37.2431   | -93.1521   |
| 128 | U.S.A. | Atkinson 2018 | 37.251555 | -79.929922 |
| 129 | U.S.A. | Atkinson 2018 | 37.7832   | -94.8246   |
| 130 | U.S.A. | Atkinson 2018 | 37.79810  | -95.84530  |
| 131 | U.S.A. | Atkinson 2018 | 37.8229   | -92.1162   |
| 132 | U.S.A. | Atkinson 2018 | 37.981    | -85.6774   |
| 133 | U.S.A. | Atkinson 2018 | 37.9889   | -84.4177   |
| 134 | U.S.A. | Atkinson 2018 | 38.0406   | -84.5037   |
| 135 | U.S.A. | Atkinson 2018 | 38.0766   | -85.7597   |
| 136 | U.S.A. | Atkinson 2018 | 38.1051   | -85.7589   |
| 137 | U.S.A. | Atkinson 2018 | 38.110818 | -78.986088 |
| 138 | U.S.A. | Atkinson 2018 | 38.1412   | -85.6877   |
| 139 | U.S.A. | Atkinson 2018 | 38.1948   | -83.5424   |
| 140 | U.S.A. | Atkinson 2018 | 38.4749   | -85.8713   |
| 141 | U.S.A. | Atkinson 2018 | 38.488733 | -79.797127 |
| 142 | U.S.A. | Atkinson 2018 | 38.5478   | -90.4142   |
| 143 | U.S.A. | Atkinson 2018 | 38.5633   | -85.7945   |
| 144 | U.S.A. | Atkinson 2018 | 38.5664   | -90.6697   |
| 145 | U.S.A. | Atkinson 2018 | 38.65278  | -78.677741 |
| 146 | U.S.A. | Atkinson 2018 | 38.733    | -75.4009   |
| 147 | U.S.A. | Atkinson 2018 | 38.7468   | -75.1595   |
| 148 | U.S.A. | Atkinson 2018 | 38.7529   | -92.1994   |
| 149 | U.S.A. | Atkinson 2018 | 38.7597   | -92.2017   |
| 150 | U.S.A. | Atkinson 2018 | 38.7645   | -91.3913   |
| 151 | U.S.A. | Atkinson 2018 | 38.7866   | -76.2317   |
| 152 | U.S.A. | Atkinson 2018 | 38.8753   | -76.7296   |
| 153 | U.S.A. | Atkinson 2018 | 38.8901   | -93.5304   |
| 154 | U.S.A. | Atkinson 2018 | 38.916    | -86.0439   |
| 155 | U.S.A. | Atkinson 2018 | 38.931    | -76.987    |
| 156 | U.S.A. | Atkinson 2018 | 38.9457   | -75.9397   |
| 157 | U.S.A. | Atkinson 2018 | 38.9729   | -92.3575   |
| 158 | U.S.A. | Atkinson 2018 | 39.0265   | -84.6911   |
| 159 | U.S.A. | Atkinson 2018 | 39.0465   | -94.2813   |
| 160 | U.S.A. | Atkinson 2018 | 39.060844 | -81.387146 |

|     |        |               |           |            |
|-----|--------|---------------|-----------|------------|
| 161 | U.S.A. | Atkinson 2018 | 39.0642   | -76.8844   |
| 162 | U.S.A. | Atkinson 2018 | 39.065034 | -79.101353 |
| 163 | U.S.A. | Atkinson 2018 | 39.1159   | -94.5534   |
| 164 | U.S.A. | Atkinson 2018 | 39.1442   | -91.88     |
| 165 | U.S.A. | Atkinson 2018 | 39.1693   | -75.4482   |
| 166 | U.S.A. | Atkinson 2018 | 39.1814   | -75.549    |
| 167 | U.S.A. | Atkinson 2018 | 39.1856   | -86.3179   |
| 168 | U.S.A. | Atkinson 2018 | 39.1858   | -86.3178   |
| 169 | U.S.A. | Atkinson 2018 | 39.2341   | -76.6859   |
| 170 | U.S.A. | Atkinson 2018 | 39.2667   | -76.5357   |
| 171 | U.S.A. | Atkinson 2018 | 39.2912   | -77.3159   |
| 172 | U.S.A. | Atkinson 2018 | 39.3461   | -77.5058   |
| 173 | U.S.A. | Atkinson 2018 | 39.3462   | -76.6498   |
| 174 | U.S.A. | Atkinson 2018 | 39.3464   | -76.6498   |
| 175 | U.S.A. | Atkinson 2018 | 39.3577   | -81.5395   |
| 176 | U.S.A. | Atkinson 2018 | 39.3693   | -74.9424   |
| 177 | U.S.A. | Atkinson 2018 | 39.373126 | -78.522721 |
| 178 | U.S.A. | Atkinson 2018 | 39.442    | -75.1756   |
| 179 | U.S.A. | Atkinson 2018 | 39.4501   | -75.1211   |
| 180 | U.S.A. | Atkinson 2018 | 39.469    | -77.3889   |
| 181 | U.S.A. | Atkinson 2018 | 39.5482   | -79.1441   |
| 182 | U.S.A. | Atkinson 2018 | 39.656731 | -79.985388 |
| 183 | U.S.A. | Atkinson 2018 | 39.6642   | -79.3903   |
| 184 | U.S.A. | Atkinson 2018 | 39.6699   | -75.7787   |
| 185 | U.S.A. | Atkinson 2018 | 39.6741   | -75.6463   |
| 186 | U.S.A. | Atkinson 2018 | 39.6774   | -81.8833   |
| 187 | U.S.A. | Atkinson 2018 | 39.7103   | -78.4858   |
| 188 | U.S.A. | Atkinson 2018 | 39.7281   | -82.6193   |
| 189 | U.S.A. | Atkinson 2018 | 39.7283   | -82.6211   |
| 190 | U.S.A. | Atkinson 2018 | 39.741    | -82.5811   |
| 191 | U.S.A. | Atkinson 2018 | 39.7975   | -76.8855   |
| 192 | U.S.A. | Atkinson 2018 | 39.8987   | -84.1805   |
| 193 | U.S.A. | Atkinson 2018 | 39.9552   | -85.3556   |
| 194 | U.S.A. | Atkinson 2018 | 39.9671   | -82.9516   |
| 195 | U.S.A. | Atkinson 2018 | 39.9698   | -75.4456   |
| 196 | U.S.A. | Atkinson 2018 | 39.9915   | -77.9642   |
| 197 | U.S.A. | Atkinson 2018 | 39.9946   | -77.6698   |
| 198 | U.S.A. | Atkinson 2018 | 39.9947   | -77.6706   |
| 199 | U.S.A. | Atkinson 2018 | 40.01     | -74.57     |
| 200 | U.S.A. | Atkinson 2018 | 40.0302   | -76.7053   |
| 201 | U.S.A. | Atkinson 2018 | 40.0405   | -78.6316   |

|     |        |               |           |            |
|-----|--------|---------------|-----------|------------|
| 202 | U.S.A. | Atkinson 2018 | 40.0442   | -78.1329   |
| 203 | U.S.A. | Atkinson 2018 | 40.050454 | -80.624079 |
| 204 | U.S.A. | Atkinson 2018 | 40.0508   | -78.1139   |
| 205 | U.S.A. | Atkinson 2018 | 40.0965   | -85.6178   |
| 206 | U.S.A. | Atkinson 2018 | 40.0985   | -85.6172   |
| 207 | U.S.A. | Atkinson 2018 | 40.134    | -74.962    |
| 208 | U.S.A. | Atkinson 2018 | 40.1949   | -75.4063   |
| 209 | U.S.A. | Atkinson 2018 | 40.227    | -74.3689   |
| 210 | U.S.A. | Atkinson 2018 | 40.227    | -74.369    |
| 211 | U.S.A. | Atkinson 2018 | 40.229    | -77.1116   |
| 212 | U.S.A. | Atkinson 2018 | 40.2425   | -76.4624   |
| 213 | U.S.A. | Atkinson 2018 | 40.2983   | -77.5956   |
| 214 | U.S.A. | Atkinson 2018 | 40.2984   | -77.5958   |
| 215 | U.S.A. | Atkinson 2018 | 40.3027   | -75.1038   |
| 216 | U.S.A. | Atkinson 2018 | 40.3255   | -76.8912   |
| 217 | U.S.A. | Atkinson 2018 | 40.3911   | -74.6684   |
| 218 | U.S.A. | Atkinson 2018 | 40.4237   | -76.5898   |
| 219 | U.S.A. | Atkinson 2018 | 40.47     | -74.42     |
| 220 | U.S.A. | Atkinson 2018 | 40.472    | -74.425    |
| 221 | U.S.A. | Atkinson 2018 | 40.53     | -74.63     |
| 222 | U.S.A. | Atkinson 2018 | 40.53476  | -80.582052 |
| 223 | U.S.A. | Atkinson 2018 | 40.549    | -74.638    |
| 224 | U.S.A. | Atkinson 2018 | 40.55     | -74.95     |
| 225 | U.S.A. | Atkinson 2018 | 40.5618   | -74.9624   |
| 226 | U.S.A. | Atkinson 2018 | 40.562    | -74.962    |
| 227 | U.S.A. | Atkinson 2018 | 40.739    | -76.308    |
| 228 | U.S.A. | Atkinson 2018 | 40.7544   | -82.3619   |
| 229 | U.S.A. | Atkinson 2018 | 40.7704   | -77.6552   |
| 230 | U.S.A. | Atkinson 2018 | 40.7741   | -79.3696   |
| 231 | U.S.A. | Atkinson 2018 | 40.7741   | -79.5864   |
| 232 | U.S.A. | Atkinson 2018 | 40.7757   | -77.5937   |
| 233 | U.S.A. | Atkinson 2018 | 40.7758   | -77.5944   |
| 234 | U.S.A. | Atkinson 2018 | 40.7815   | -81.9161   |
| 235 | U.S.A. | Atkinson 2018 | 40.8298   | -77.223    |
| 236 | U.S.A. | Atkinson 2018 | 40.879    | -82.296    |
| 237 | U.S.A. | Atkinson 2018 | 40.901    | -73.8934   |
| 238 | U.S.A. | Atkinson 2018 | 40.9033   | -78.0837   |
| 239 | U.S.A. | Atkinson 2018 | 40.9042   | -78.0836   |
| 240 | U.S.A. | Atkinson 2018 | 40.9045   | -78.0834   |
| 241 | U.S.A. | Atkinson 2018 | 40.9837   | -95.8784   |
| 242 | U.S.A. | Atkinson 2018 | 40.9894   | -77.3051   |

|     |        |               |           |             |
|-----|--------|---------------|-----------|-------------|
| 243 | U.S.A. | Atkinson 2018 | 40.9896   | -77.3051    |
| 244 | U.S.A. | Atkinson 2018 | 41.0255   | -83.6662    |
| 245 | U.S.A. | Atkinson 2018 | 41.0257   | -83.6659    |
| 246 | U.S.A. | Atkinson 2018 | 41.0694   | -81.7363    |
| 247 | U.S.A. | Atkinson 2018 | 41.0756   | -85.2034    |
| 248 | U.S.A. | Atkinson 2018 | 41.111    | -73.8669    |
| 249 | U.S.A. | Atkinson 2018 | 41.12     | -87.8612    |
| 250 | U.S.A. | Atkinson 2018 | 41.1216   | -78.5301    |
| 251 | U.S.A. | Atkinson 2018 | 41.1248   | -74.7482    |
| 252 | U.S.A. | Atkinson 2018 | 41.1254   | -74.75      |
| 253 | U.S.A. | Atkinson 2018 | 41.1314   | -80.7042    |
| 254 | U.S.A. | Atkinson 2018 | 41.137617 | -104.800489 |
| 255 | U.S.A. | Atkinson 2018 | 41.2112   | -96.3491    |
| 256 | U.S.A. | Atkinson 2018 | 41.2116   | -81.6671    |
| 257 | U.S.A. | Atkinson 2018 | 41.2342   | -81.5264    |
| 258 | U.S.A. | Atkinson 2018 | 41.2353   | -79.3696    |
| 259 | U.S.A. | Atkinson 2018 | 41.2539   | -76.9284    |
| 260 | U.S.A. | Atkinson 2018 | 41.2558   | -73.6019    |
| 261 | U.S.A. | Atkinson 2018 | 41.3411   | -75.8829    |
| 262 | U.S.A. | Atkinson 2018 | 41.3533   | -72.9142    |
| 263 | U.S.A. | Atkinson 2018 | 41.3603   | -76.2982    |
| 264 | U.S.A. | Atkinson 2018 | 41.3794   | -74.6233    |
| 265 | U.S.A. | Atkinson 2018 | 41.4028   | -86.3008    |
| 266 | U.S.A. | Atkinson 2018 | 41.4058   | -70.6008    |
| 267 | U.S.A. | Atkinson 2018 | 41.4206   | -85.0034    |
| 268 | U.S.A. | Atkinson 2018 | 41.4341   | -85.4484    |
| 269 | U.S.A. | Atkinson 2018 | 41.4755   | -81.3412    |
| 270 | U.S.A. | Atkinson 2018 | 41.4793   | -72.2836    |
| 271 | U.S.A. | Atkinson 2018 | 41.4851   | -74.1316    |
| 272 | U.S.A. | Atkinson 2018 | 41.488    | -77.5592    |
| 273 | U.S.A. | Atkinson 2018 | 41.4889   | -77.5591    |
| 274 | U.S.A. | Atkinson 2018 | 41.5118   | -71.6905    |
| 275 | U.S.A. | Atkinson 2018 | 41.5357   | -88.0521    |
| 276 | U.S.A. | Atkinson 2018 | 41.5455   | -73.9473    |
| 277 | U.S.A. | Atkinson 2018 | 41.5647   | -71.5329    |
| 278 | U.S.A. | Atkinson 2018 | 41.5648   | -71.5329    |
| 279 | U.S.A. | Atkinson 2018 | 41.5735   | -87.7847    |
| 280 | U.S.A. | Atkinson 2018 | 41.6014   | -77.8087    |
| 281 | U.S.A. | Atkinson 2018 | 41.6049   | -71.473     |
| 282 | U.S.A. | Atkinson 2018 | 41.6736   | -88.0017    |
| 283 | U.S.A. | Atkinson 2018 | 41.6849   | -70.2859    |

|     |        |               |           |            |
|-----|--------|---------------|-----------|------------|
| 284 | U.S.A. | Atkinson 2018 | 41.6913   | -71.6938   |
| 285 | U.S.A. | Atkinson 2018 | 41.7012   | -85.0075   |
| 286 | U.S.A. | Atkinson 2018 | 41.7528   | -74.3409   |
| 287 | U.S.A. | Atkinson 2018 | 41.7848   | -70.9671   |
| 288 | U.S.A. | Atkinson 2018 | 41.8011   | -88.0748   |
| 289 | U.S.A. | Atkinson 2018 | 41.8078   | -78.3671   |
| 290 | U.S.A. | Atkinson 2018 | 41.8128   | -78.3684   |
| 291 | U.S.A. | Atkinson 2018 | 41.8178   | -88.1734   |
| 292 | U.S.A. | Atkinson 2018 | 41.8186   | -81.0386   |
| 293 | U.S.A. | Atkinson 2018 | 41.8237   | -81.051    |
| 294 | U.S.A. | Atkinson 2018 | 41.8378   | -88.2125   |
| 295 | U.S.A. | Atkinson 2018 | 41.8463   | -88.3095   |
| 296 | U.S.A. | Atkinson 2018 | 41.8488   | -71.7299   |
| 297 | U.S.A. | Atkinson 2018 | 41.8606   | -72.6863   |
| 298 | U.S.A. | Atkinson 2018 | 41.91     | -83.5733   |
| 299 | U.S.A. | Atkinson 2018 | 41.913    | -85.793    |
| 300 | U.S.A. | Atkinson 2018 | 41.933344 | -73.005974 |
| 301 | U.S.A. | Atkinson 2018 | 41.9453   | -71.1214   |
| 302 | U.S.A. | Atkinson 2018 | 41.9845   | -71.6214   |
| 303 | U.S.A. | Atkinson 2018 | 42.012    | -75.7409   |
| 304 | U.S.A. | Atkinson 2018 | 42.012    | -75.741    |
| 305 | U.S.A. | Atkinson 2018 | 42.0607   | -71.2885   |
| 306 | U.S.A. | Atkinson 2018 | 42.0634   | -71.2878   |
| 307 | U.S.A. | Atkinson 2018 | 42.0644   | -72.4443   |
| 308 | U.S.A. | Atkinson 2018 | 42.0701   | -72.1014   |
| 309 | U.S.A. | Atkinson 2018 | 42.0883   | -88.1953   |
| 310 | U.S.A. | Atkinson 2018 | 42.0893   | -72.6718   |
| 311 | U.S.A. | Atkinson 2018 | 42.1069   | -72.6208   |
| 312 | U.S.A. | Atkinson 2018 | 42.1091   | -73.3852   |
| 313 | U.S.A. | Atkinson 2018 | 42.1312   | -71.2531   |
| 314 | U.S.A. | Atkinson 2018 | 42.1364   | -78.6355   |
| 315 | U.S.A. | Atkinson 2018 | 42.1371   | -77.156    |
| 316 | U.S.A. | Atkinson 2018 | 42.1703   | -80.0887   |
| 317 | U.S.A. | Atkinson 2018 | 42.1705   | -80.0893   |
| 318 | U.S.A. | Atkinson 2018 | 42.1706   | -83.145    |
| 319 | U.S.A. | Atkinson 2018 | 42.1822   | -85.6344   |
| 320 | U.S.A. | Atkinson 2018 | 42.1839   | -73.262    |
| 321 | U.S.A. | Atkinson 2018 | 42.1862   | -72.6538   |
| 322 | U.S.A. | Atkinson 2018 | 42.1962   | -73.2549   |
| 323 | U.S.A. | Atkinson 2018 | 42.197    | -74.05     |
| 324 | U.S.A. | Atkinson 2018 | 42.2017   | -74.0451   |



|     |        |               |           |            |
|-----|--------|---------------|-----------|------------|
| 325 | U.S.A. | Atkinson 2018 | 42.2033   | -79.1841   |
| 326 | U.S.A. | Atkinson 2018 | 42.2127   | -75.8289   |
| 327 | U.S.A. | Atkinson 2018 | 42.2142   | -75.8346   |
| 328 | U.S.A. | Atkinson 2018 | 42.2259   | -84.4013   |
| 329 | U.S.A. | Atkinson 2018 | 42.2428   | -75.3775   |
| 330 | U.S.A. | Atkinson 2018 | 42.2534   | -71.3711   |
| 331 | U.S.A. | Atkinson 2018 | 42.255    | -87.9267   |
| 332 | U.S.A. | Atkinson 2018 | 42.2622   | -78.9577   |
| 333 | U.S.A. | Atkinson 2018 | 42.2845   | -72.5326   |
| 334 | U.S.A. | Atkinson 2018 | 42.2937   | -76.0874   |
| 335 | U.S.A. | Atkinson 2018 | 42.3006   | -71.2127   |
| 336 | U.S.A. | Atkinson 2018 | 42.3041   | -71.478    |
| 337 | U.S.A. | Atkinson 2018 | 42.349    | -73.0283   |
| 338 | U.S.A. | Atkinson 2018 | 42.3517   | -71.7615   |
| 339 | U.S.A. | Atkinson 2018 | 42.4062   | -71.2717   |
| 340 | U.S.A. | Atkinson 2018 | 42.4626   | -73.1886   |
| 341 | U.S.A. | Atkinson 2018 | 42.4953   | -71.8272   |
| 342 | U.S.A. | Atkinson 2018 | 42.4958   | -71.0203   |
| 343 | U.S.A. | Atkinson 2018 | 42.5008   | -71.7032   |
| 344 | U.S.A. | Atkinson 2018 | 42.5045   | -83.8509   |
| 345 | U.S.A. | Atkinson 2018 | 42.5081   | -84.8511   |
| 346 | U.S.A. | Atkinson 2018 | 42.5083   | -83.8513   |
| 347 | U.S.A. | Atkinson 2018 | 42.5145   | -73.3398   |
| 348 | U.S.A. | Atkinson 2018 | 42.5157   | -71.1514   |
| 349 | U.S.A. | Atkinson 2018 | 42.5163   | -76.5861   |
| 350 | U.S.A. | Atkinson 2018 | 42.5173   | -71.2312   |
| 351 | U.S.A. | Atkinson 2018 | 42.5494   | -71.1314   |
| 352 | U.S.A. | Atkinson 2018 | 42.5702   | -83.5529   |
| 353 | U.S.A. | Atkinson 2018 | 42.5703   | -84.5528   |
| 354 | U.S.A. | Atkinson 2018 | 42.5784   | -72.5126   |
| 355 | U.S.A. | Atkinson 2018 | 42.5939   | -71.032    |
| 356 | U.S.A. | Atkinson 2018 | 42.599144 | -87.838075 |
| 357 | U.S.A. | Atkinson 2018 | 42.609    | -73.8958   |
| 358 | U.S.A. | Atkinson 2018 | 42.6133   | -73.8928   |
| 359 | U.S.A. | Atkinson 2018 | 42.6168   | -83.9281   |
| 360 | U.S.A. | Atkinson 2018 | 42.6169   | -84.9281   |
| 361 | U.S.A. | Atkinson 2018 | 42.6251   | -73.0359   |
| 362 | U.S.A. | Atkinson 2018 | 42.6333   | -71.3167   |
| 363 | U.S.A. | Atkinson 2018 | 42.6524   | -73.4158   |
| 364 | U.S.A. | Atkinson 2018 | 42.6699   | -77.8418   |
| 365 | U.S.A. | Atkinson 2018 | 42.6813   | -75.5135   |

|     |        |               |           |            |
|-----|--------|---------------|-----------|------------|
| 366 | U.S.A. | Atkinson 2018 | 42.7153   | -83.0786   |
| 367 | U.S.A. | Atkinson 2018 | 42.7156   | -84.5222   |
| 368 | U.S.A. | Atkinson 2018 | 42.7185   | -72.5679   |
| 369 | U.S.A. | Atkinson 2018 | 42.7188   | -73.8753   |
| 370 | U.S.A. | Atkinson 2018 | 42.7377   | -83.0644   |
| 371 | U.S.A. | Atkinson 2018 | 42.7421   | -84.4871   |
| 372 | U.S.A. | Atkinson 2018 | 42.7533   | -84.7464   |
| 373 | U.S.A. | Atkinson 2018 | 42.7662   | -71.1141   |
| 374 | U.S.A. | Atkinson 2018 | 42.7725   | -73.4592   |
| 375 | U.S.A. | Atkinson 2018 | 42.7729   | -73.4585   |
| 376 | U.S.A. | Atkinson 2018 | 42.7859   | -73.9985   |
| 377 | U.S.A. | Atkinson 2018 | 42.817    | -78.1571   |
| 378 | U.S.A. | Atkinson 2018 | 42.8196   | -78.1387   |
| 379 | U.S.A. | Atkinson 2018 | 42.8505   | -100.511   |
| 380 | U.S.A. | Atkinson 2018 | 42.85802  | -72.572382 |
| 381 | U.S.A. | Atkinson 2018 | 42.8689   | -76.9781   |
| 382 | U.S.A. | Atkinson 2018 | 42.8894   | -78.7181   |
| 383 | U.S.A. | Atkinson 2018 | 42.9087   | -78.4242   |
| 384 | U.S.A. | Atkinson 2018 | 42.914955 | -87.849083 |
| 385 | U.S.A. | Atkinson 2018 | 42.9297   | -78.5933   |
| 386 | U.S.A. | Atkinson 2018 | 42.961    | -85.309    |
| 387 | U.S.A. | Atkinson 2018 | 43.0309   | -71.1573   |
| 388 | U.S.A. | Atkinson 2018 | 43.0356   | -85.4908   |
| 389 | U.S.A. | Atkinson 2018 | 43.0358   | -85.4909   |
| 390 | U.S.A. | Atkinson 2018 | 43.0415   | -73.8255   |
| 391 | U.S.A. | Atkinson 2018 | 43.0522   | -75.9696   |
| 392 | U.S.A. | Atkinson 2018 | 43.074    | -75.2453   |
| 393 | U.S.A. | Atkinson 2018 | 43.0912   | -70.7813   |
| 394 | U.S.A. | Atkinson 2018 | 43.1006   | -83.5558   |
| 395 | U.S.A. | Atkinson 2018 | 43.1006   | -83.5581   |
| 396 | U.S.A. | Atkinson 2018 | 43.1116   | -74.7774   |
| 397 | U.S.A. | Atkinson 2018 | 43.1547   | -76.0553   |
| 398 | U.S.A. | Atkinson 2018 | 43.1849   | -78.9267   |
| 399 | U.S.A. | Atkinson 2018 | 43.1975   | -76.33     |
| 400 | U.S.A. | Atkinson 2018 | 43.2279   | -77.5544   |
| 401 | U.S.A. | Atkinson 2018 | 43.2336   | -77.5545   |
| 402 | U.S.A. | Atkinson 2018 | 43.2896   | -75.3214   |
| 403 | U.S.A. | Atkinson 2018 | 43.2943   | -75.3216   |
| 404 | U.S.A. | Atkinson 2018 | 43.3232   | -73.6695   |
| 405 | U.S.A. | Atkinson 2018 | 43.335    | -84.667    |
| 406 | U.S.A. | Atkinson 2018 | 43.3636   | -76.4363   |

|     |        |               |           |            |
|-----|--------|---------------|-----------|------------|
| 407 | U.S.A. | Atkinson 2018 | 43.3648   | -76.4375   |
| 408 | U.S.A. | Atkinson 2018 | 43.4069   | -82.7347   |
| 409 | U.S.A. | Atkinson 2018 | 43.4235   | -70.6877   |
| 410 | U.S.A. | Atkinson 2018 | 43.4282   | -70.6496   |
| 411 | U.S.A. | Atkinson 2018 | 43.455    | -84.7275   |
| 412 | U.S.A. | Atkinson 2018 | 43.4551   | -84.7276   |
| 413 | U.S.A. | Atkinson 2018 | 43.5122   | -75.9893   |
| 414 | U.S.A. | Atkinson 2018 | 43.5564   | -75.2631   |
| 415 | U.S.A. | Atkinson 2018 | 43.5583   | -73.8095   |
| 416 | U.S.A. | Atkinson 2018 | 43.6181   | -74.0197   |
| 417 | U.S.A. | Atkinson 2018 | 43.6251   | -70.2979   |
| 418 | U.S.A. | Atkinson 2018 | 43.6484   | -70.3842   |
| 419 | U.S.A. | Atkinson 2018 | 43.6498   | -70.3021   |
| 420 | U.S.A. | Atkinson 2018 | 43.6835   | -71.5684   |
| 421 | U.S.A. | Atkinson 2018 | 43.7078   | -72.2404   |
| 422 | U.S.A. | Atkinson 2018 | 43.74347  | -87.720671 |
| 423 | U.S.A. | Atkinson 2018 | 43.7599   | -103.373   |
| 424 | U.S.A. | Atkinson 2018 | 43.7724   | -70.4041   |
| 425 | U.S.A. | Atkinson 2018 | 43.7799   | -74.225    |
| 426 | U.S.A. | Atkinson 2018 | 43.8266   | -82.9888   |
| 427 | U.S.A. | Atkinson 2018 | 43.8343   | -71.1951   |
| 428 | U.S.A. | Atkinson 2018 | 43.9401   | -69.8206   |
| 429 | U.S.A. | Atkinson 2018 | 43.9643   | -103.216   |
| 430 | U.S.A. | Atkinson 2018 | 43.979    | -84.8421   |
| 431 | U.S.A. | Atkinson 2018 | 43.9855   | -70.5478   |
| 432 | U.S.A. | Atkinson 2018 | 43.9914   | -84.3951   |
| 433 | U.S.A. | Atkinson 2018 | 44.0016   | -83.7893   |
| 434 | U.S.A. | Atkinson 2018 | 44.0167   | -86.3333   |
| 435 | U.S.A. | Atkinson 2018 | 44.0169   | -86.3335   |
| 436 | U.S.A. | Atkinson 2018 | 44.0169   | -86.5001   |
| 437 | U.S.A. | Atkinson 2018 | 44.0248   | -76.0087   |
| 438 | U.S.A. | Atkinson 2018 | 44.0298   | -70.3299   |
| 439 | U.S.A. | Atkinson 2018 | 44.0544   | -70.2897   |
| 440 | U.S.A. | Atkinson 2018 | 44.0613   | -70.1907   |
| 441 | U.S.A. | Atkinson 2018 | 44.085    | -75.4878   |
| 442 | U.S.A. | Atkinson 2018 | 44.1935   | -69.5428   |
| 443 | U.S.A. | Atkinson 2018 | 44.198312 | -72.585406 |
| 444 | U.S.A. | Atkinson 2018 | 44.2013   | -103.666   |
| 445 | U.S.A. | Atkinson 2018 | 44.231825 | -72.110387 |
| 446 | U.S.A. | Atkinson 2018 | 44.2346   | -73.9059   |
| 447 | U.S.A. | Atkinson 2018 | 44.2386   | -70.0361   |

|     |        |               |           |            |
|-----|--------|---------------|-----------|------------|
| 448 | U.S.A. | Atkinson 2018 | 44.2402   | -68.3028   |
| 449 | U.S.A. | Atkinson 2018 | 44.2444   | -86.3242   |
| 450 | U.S.A. | Atkinson 2018 | 44.2597   | -70.5011   |
| 451 | U.S.A. | Atkinson 2018 | 44.331    | -83.6462   |
| 452 | U.S.A. | Atkinson 2018 | 44.3855   | -103.714   |
| 453 | U.S.A. | Atkinson 2018 | 44.3947   | -84.3881   |
| 454 | U.S.A. | Atkinson 2018 | 44.4454   | -69.8343   |
| 455 | U.S.A. | Atkinson 2018 | 44.44598  | -72.002444 |
| 456 | U.S.A. | Atkinson 2018 | 44.5006   | -84.5074   |
| 457 | U.S.A. | Atkinson 2018 | 44.6091   | -75.2668   |
| 458 | U.S.A. | Atkinson 2018 | 44.6169   | -85.511    |
| 459 | U.S.A. | Atkinson 2018 | 44.669    | -85.5604   |
| 460 | U.S.A. | Atkinson 2018 | 44.6724   | -85.0837   |
| 461 | U.S.A. | Atkinson 2018 | 44.7      | -86.1835   |
| 462 | U.S.A. | Atkinson 2018 | 44.7001   | -84.623    |
| 463 | U.S.A. | Atkinson 2018 | 44.7343   | -73.7339   |
| 464 | U.S.A. | Atkinson 2018 | 44.7494   | -84.6796   |
| 465 | U.S.A. | Atkinson 2018 | 44.8831   | -68.6725   |
| 466 | U.S.A. | Atkinson 2018 | 44.8932   | -85.8218   |
| 467 | U.S.A. | Atkinson 2018 | 44.9478   | -70.175    |
| 468 | U.S.A. | Atkinson 2018 | 45.0505   | -71.4287   |
| 469 | U.S.A. | Atkinson 2018 | 45.8105   | -108.523   |
| 470 | U.S.A. | Atkinson 2018 | 45.8594   | -84.6332   |
| 471 | U.S.A. | Atkinson 2018 | 45.9404   | -86.3439   |
| 472 | U.S.A. | Atkinson 2018 | 46.0911   | -68.9569   |
| 473 | U.S.A. | Atkinson 2018 | 46.2306   | -68.1203   |
| 474 | U.S.A. | Atkinson 2018 | 46.3117   | -84.5932   |
| 475 | U.S.A. | Atkinson 2018 | 46.4056   | -94.2759   |
| 476 | U.S.A. | Atkinson 2018 | 46.4685   | -85.5568   |
| 477 | U.S.A. | Atkinson 2018 | 46.5167   | -86.6667   |
| 478 | U.S.A. | Atkinson 2018 | 46.5331   | -93.71     |
| 479 | U.S.A. | Atkinson 2018 | 46.6352   | -87.4816   |
| 480 | U.S.A. | Atkinson 2018 | 46.942    | -67.898    |
| 481 | U.S.A. | Atkinson 2018 | 47.0275   | -88.6422   |
| 482 | U.S.A. | Atkinson 2018 | 47.0482   | -94.1457   |
| 483 | U.S.A. | Atkinson 2018 | 47.3794   | -94.6039   |
| 484 | Italy  | Bernabo 2000  | 45.443633 | 8.614723   |
| 485 | Italy  | Bernabo 2000  | 45.507011 | 8.705456   |
| 486 | Italy  | Bernabo 2000  | 46.30     | 12.47      |
| 487 | Italy  | Bernabo 2000  | 46.40     | 13.11      |
| 488 | Italy  | Bernabo 2000  | 46.419260 | 12.926644  |

|     |         |                    |           |           |
|-----|---------|--------------------|-----------|-----------|
| 489 | Italy   | Bernabo 2000       | 46.533688 | 13.011233 |
| 490 | Germany | Bleich et al. 2019 | 47.580244 | 8.433267  |
| 491 | Germany | Bleich et al. 2019 | 47.665945 | 9.517946  |
| 492 | Germany | Bleich et al. 2019 | 47.668937 | 7.700988  |
| 493 | Germany | Bleich et al. 2019 | 47.826455 | 12.060054 |
| 494 | Germany | Bleich et al. 2019 | 47.919901 | 9.376544  |
| 495 | Germany | Bleich et al. 2019 | 48.085511 | 11.362992 |
| 496 | Germany | Bleich et al. 2019 | 48.265240 | 8.229261  |
| 497 | Germany | Bleich et al. 2019 | 48.549187 | 9.034434  |
| 498 | Germany | Bleich et al. 2019 | 48.759880 | 8.084573  |
| 499 | Germany | Bleich et al. 2019 | 48.857291 | 8.780852  |
| 500 | Germany | Bleich et al. 2019 | 48.864243 | 13.376535 |
| 501 | Germany | Bleich et al. 2019 | 48.896605 | 8.506312  |
| 502 | Germany | Bleich et al. 2019 | 48.897377 | 8.398252  |
| 503 | Germany | Bleich et al. 2019 | 48.944785 | 13.383511 |
| 504 | Germany | Bleich et al. 2019 | 48.965228 | 8.365365  |
| 505 | Germany | Bleich et al. 2019 | 48.998837 | 9.260558  |
| 506 | Germany | Bleich et al. 2019 | 49.038394 | 8.506969  |
| 507 | Germany | Bleich et al. 2019 | 49.070478 | 13.267843 |
| 508 | Germany | Bleich et al. 2019 | 49.119542 | 13.273319 |
| 509 | Germany | Bleich et al. 2019 | 49.126203 | 12.033908 |
| 510 | Germany | Bleich et al. 2019 | 49.153189 | 7.650899  |
| 511 | Germany | Bleich et al. 2019 | 49.350658 | 8.342034  |
| 512 | Germany | Bleich et al. 2019 | 49.361442 | 7.000868  |
| 513 | Germany | Bleich et al. 2019 | 49.477896 | 11.363670 |
| 514 | Germany | Bleich et al. 2019 | 49.480712 | 11.159595 |
| 515 | Germany | Bleich et al. 2019 | 49.527317 | 12.118635 |
| 516 | Germany | Bleich et al. 2019 | 49.528361 | 11.122062 |
| 517 | Germany | Bleich et al. 2019 | 49.532191 | 11.066268 |
| 518 | Germany | Bleich et al. 2019 | 49.580299 | 11.047830 |
| 519 | Germany | Bleich et al. 2019 | 49.782935 | 8.625107  |
| 520 | Germany | Bleich et al. 2019 | 49.873263 | 8.725044  |
| 521 | Germany | Bleich et al. 2019 | 49.924358 | 11.551877 |
| 522 | Germany | Bleich et al. 2019 | 49.982021 | 8.955069  |
| 523 | Germany | Bleich et al. 2019 | 50.044855 | 8.225323  |
| 524 | Germany | Bleich et al. 2019 | 50.069570 | 9.050098  |
| 525 | Germany | Bleich et al. 2019 | 50.129955 | 7.254725  |
| 526 | Germany | Bleich et al. 2019 | 50.138483 | 8.961635  |
| 527 | Germany | Bleich et al. 2019 | 50.164985 | 8.942294  |
| 528 | Germany | Bleich et al. 2019 | 50.590732 | 8.699491  |
| 529 | Germany | Bleich et al. 2019 | 50.623308 | 6.463726  |

|     |         |                    |           |           |
|-----|---------|--------------------|-----------|-----------|
| 530 | Germany | Bleich et al. 2019 | 50.725513 | 6.539366  |
| 531 | Germany | Bleich et al. 2019 | 50.924008 | 7.108989  |
| 532 | Germany | Bleich et al. 2019 | 51.295046 | 7.541292  |
| 533 | Germany | Bleich et al. 2019 | 51.319907 | 7.370041  |
| 534 | Germany | Bleich et al. 2019 | 51.336774 | 7.436189  |
| 535 | Germany | Bleich et al. 2019 | 51.381951 | 7.612595  |
| 536 | Germany | Bleich et al. 2019 | 51.471297 | 7.543814  |
| 537 | Germany | Bleich et al. 2019 | 51.761348 | 7.286357  |
| 538 | Germany | Bleich et al. 2019 | 51.855510 | 8.791231  |
| 539 | Germany | Bleich et al. 2019 | 51.856537 | 8.705062  |
| 540 | Germany | Bleich et al. 2019 | 51.899186 | 7.618097  |
| 541 | Germany | Bleich et al. 2019 | 52.015845 | 8.465689  |
| 542 | Germany | Bleich et al. 2019 | 52.125998 | 8.241868  |
| 543 | Germany | Bleich et al. 2019 | 52.473726 | 9.135755  |
| 544 | Germany | Bleich et al. 2019 | 52.511189 | 9.221875  |
| 545 | Germany | Bleich et al. 2019 | 52.522008 | 9.237028  |
| 546 | Germany | Bleich et al. 2019 | 52.582546 | 9.184522  |
| 547 | Germany | Bleich et al. 2019 | 52.626552 | 8.900397  |
| 548 | Germany | Bleich et al. 2019 | 52.635438 | 9.070530  |
| 549 | Germany | Bleich et al. 2019 | 52.643772 | 8.895508  |
| 550 | Germany | Bleich et al. 2019 | 52.644188 | 9.286733  |
| 551 | Germany | Bleich et al. 2019 | 52.667097 | 9.313474  |
| 552 | Germany | Bleich et al. 2019 | 52.673343 | 9.128870  |
| 553 | Germany | Bleich et al. 2019 | 52.673818 | 9.073648  |
| 554 | Germany | Bleich et al. 2019 | 52.674998 | 9.418087  |
| 555 | Germany | Bleich et al. 2019 | 52.676559 | 9.436686  |
| 556 | Germany | Bleich et al. 2019 | 52.726869 | 9.555329  |
| 557 | Germany | Bleich et al. 2019 | 52.726952 | 9.551801  |
| 558 | Germany | Bleich et al. 2019 | 52.770638 | 9.430957  |
| 559 | Germany | Bleich et al. 2019 | 52.790867 | 9.460215  |
| 560 | Germany | Bleich et al. 2019 | 52.911262 | 11.094725 |
| 561 | Germany | Bleich et al. 2019 | 52.911966 | 10.925789 |
| 562 | Germany | Bleich et al. 2019 | 52.917059 | 11.212092 |
| 563 | Germany | Bleich et al. 2019 | 52.934859 | 11.444193 |
| 564 | Germany | Bleich et al. 2019 | 52.979522 | 11.339899 |
| 565 | Germany | Bleich et al. 2019 | 52.986146 | 11.434559 |
| 566 | Germany | Bleich et al. 2019 | 53.005157 | 11.446942 |
| 567 | Germany | Bleich et al. 2019 | 53.072959 | 11.437257 |
| 568 | Germany | Bleich et al. 2019 | 53.162283 | 11.179257 |
| 569 | Germany | Bleich et al. 2019 | 53.163585 | 11.025046 |
| 570 | Germany | Bleich et al. 2019 | 53.172872 | 10.112044 |

|     |         |                    |            |           |
|-----|---------|--------------------|------------|-----------|
| 571 | Germany | Bleich et al. 2019 | 53.190134  | 9.854397  |
| 572 | Germany | Bleich et al. 2019 | 53.195626  | 10.126512 |
| 573 | Germany | Bleich et al. 2019 | 53.209055  | 10.004347 |
| 574 | Germany | Bleich et al. 2019 | 53.222449  | 10.061363 |
| 575 | Germany | Bleich et al. 2019 | 53.225645  | 10.058950 |
| 576 | Germany | Bleich et al. 2019 | 53.246255  | 10.246399 |
| 577 | Germany | Bleich et al. 2019 | 53.255643  | 11.021919 |
| 578 | Germany | Bleich et al. 2019 | 53.261250  | 9.835865  |
| 579 | Germany | Bleich et al. 2019 | 53.269905  | 9.813125  |
| 580 | Germany | Bleich et al. 2019 | 53.274114  | 10.891397 |
| 581 | Germany | Bleich et al. 2019 | 53.277060  | 10.264245 |
| 582 | Germany | Bleich et al. 2019 | 53.294229  | 9.808492  |
| 583 | Germany | Bleich et al. 2019 | 53.317893  | 9.560437  |
| 584 | Germany | Bleich et al. 2019 | 53.338325  | 9.737266  |
| 585 | Germany | Bleich et al. 2019 | 53.374594  | 9.741559  |
| 586 | Germany | Bleich et al. 2019 | 53.424203  | 9.475661  |
| 587 | Germany | Bleich et al. 2019 | 53.441589  | 10.663521 |
| 588 | Germany | Bleich et al. 2019 | 53.476952  | 10.764759 |
| 589 | Germany | Bleich et al. 2019 | 53.509162  | 10.344925 |
| 590 | Germany | Bleich et al. 2019 | 53.559644  | 10.704583 |
| 591 | Germany | Bleich et al. 2019 | 53.565476  | 10.362770 |
| 592 | Germany | Bleich et al. 2019 | 53.599595  | 10.681247 |
| 593 | Germany | Bleich et al. 2019 | 53.654161  | 10.726547 |
| 594 | Germany | Bleich et al. 2019 | 53.781526  | 10.607599 |
| 595 | Germany | Bleich et al. 2019 | 53.822919  | 10.709228 |
| 596 | Germany | Bleich et al. 2019 | 53.957035  | 10.153406 |
| 597 | Austria | GBIF 2021          | 47.2166667 | 15.8      |
| 598 | Belgium | GBIF 2021          | 49.644     | 5.667     |
| 599 | Belgium | GBIF 2021          | 49.981     | 4.43      |
| 600 | Belgium | GBIF 2021          | 50.023     | 4.64      |
| 601 | Belgium | GBIF 2021          | 50.025     | 4.501     |
| 602 | Belgium | GBIF 2021          | 50.027     | 4.361     |
| 603 | Belgium | GBIF 2021          | 50.06      | 5.131     |
| 604 | Belgium | GBIF 2021          | 50.069     | 4.572     |
| 605 | Belgium | GBIF 2021          | 50.073     | 4.293     |
| 606 | Belgium | GBIF 2021          | 50.248     | 4.648     |
| 607 | Belgium | GBIF 2021          | 50.342     | 4.3       |
| 608 | Belgium | GBIF 2021          | 50.383     | 4.653     |
| 609 | Belgium | GBIF 2021          | 50.674961  | 13.374932 |
| 610 | Belgium | GBIF 2021          | 50.702     | 4.31      |
| 611 | Belgium | GBIF 2021          | 51.042     | 5.532     |

|     |             |           |            |             |
|-----|-------------|-----------|------------|-------------|
| 612 | Belgium     | GBIF 2021 | 51.045     | 5.39        |
| 613 | Belgium     | GBIF 2021 | 51.329     | 4.543       |
| 614 | Canada      | GBIF 2021 | 42.6725    | -80.49056   |
| 615 | Canada      | GBIF 2021 | 43.653226  | -79.3831843 |
| 616 | Canada      | GBIF 2021 | 43.6677097 | -79.3947771 |
| 617 | Canada      | GBIF 2021 | 44.6383455 | -63.5651672 |
| 618 | Canada      | GBIF 2021 | 44.6819866 | -63.744311  |
| 619 | Canada      | GBIF 2021 | 45.3615026 | -73.5669892 |
| 620 | Canada      | GBIF 2021 | 45.7549    | -73.5128    |
| 621 | Canada      | GBIF 2021 | 46.5653163 | -66.4619164 |
| 622 | Canada      | GBIF 2021 | 46.625452  | -71.302746  |
| 623 | Canada      | GBIF 2021 | 51.253775  | -85.323214  |
| 624 | Switzerland | GBIF 2021 | 46.15456   | 5.98235     |
| 625 | Switzerland | GBIF 2021 | 46.18284   | 6.08522     |
| 626 | Switzerland | GBIF 2021 | 47.23384   | 8.92435     |
| 627 | Switzerland | GBIF 2021 | 47.258139  | 8.539417    |
| 628 | Switzerland | GBIF 2021 | 47.28324   | 8.52914     |
| 629 | Switzerland | GBIF 2021 | 47.33165   | 8.06705     |
| 630 | Switzerland | GBIF 2021 | 47.3323    | 7.93476     |
| 631 | Switzerland | GBIF 2021 | 47.33256   | 7.86861     |
| 632 | Switzerland | GBIF 2021 | 47.37378   | 8.46478     |
| 633 | Switzerland | GBIF 2021 | 47.46577   | 8.20127     |
| 634 | Switzerland | GBIF 2021 | 47.46827   | 7.47178     |
| 635 | Switzerland | GBIF 2021 | 47.5132    | 7.53819     |
| 636 | Switzerland | GBIF 2021 | 47.73155   | 8.67169     |
| 637 | Czechia     | GBIF 2021 | 49.529944  | 13.023111   |
| 638 | Czechia     | GBIF 2021 | 49.573583  | 12.665444   |
| 639 | Germany     | GBIF 2021 | 49.0098    | 8.10329     |
| 640 | Germany     | GBIF 2021 | 49.01      | 8.1         |
| 641 | Germany     | GBIF 2021 | 49.036098  | 8.13036     |
| 642 | Germany     | GBIF 2021 | 49.0361    | 8.13036     |
| 643 | Germany     | GBIF 2021 | 49.0361    | 8.1304      |
| 644 | Germany     | GBIF 2021 | 49.2038    | 7.39891     |
| 645 | Germany     | GBIF 2021 | 49.324     | 7.946       |
| 646 | Germany     | GBIF 2021 | 50.73      | 11.61       |
| 647 | Germany     | GBIF 2021 | 50.7331    | 11.6138     |
| 648 | Germany     | GBIF 2021 | 50.874969  | 13.708282   |
| 649 | Germany     | GBIF 2021 | 50.924969  | 13.541606   |
| 650 | Spain       | GBIF 2021 | 41.842309  | 2.307413    |
| 651 | Spain       | GBIF 2021 | 42.807111  | -3.083833   |
| 652 | Spain       | GBIF 2021 | 43.150250  | -2.678000   |



|     |         |           |           |           |
|-----|---------|-----------|-----------|-----------|
| 653 | Spain   | GBIF 2021 | 43.162222 | -2.640889 |
| 654 | Spain   | GBIF 2021 | 43.286889 | -2.688556 |
| 655 | Finland | GBIF 2021 | 60.335614 | 24.767767 |
| 656 | Finland | GBIF 2021 | 60.499945 | 26.300551 |
| 657 | France  | GBIF 2021 | 42.46835  | 2.36349   |
| 658 | France  | GBIF 2021 | 42.58524  | 2.28235   |
| 659 | France  | GBIF 2021 | 42.85151  | 2.20554   |
| 660 | France  | GBIF 2021 | 42.85152  | 2.20559   |
| 661 | France  | GBIF 2021 | 43.25     | -1.58     |
| 662 | France  | GBIF 2021 | 43.29537  | -1.62103  |
| 663 | France  | GBIF 2021 | 43.29539  | -1.62098  |
| 664 | France  | GBIF 2021 | 43.37984  | -1.75137  |
| 665 | France  | GBIF 2021 | 43.37985  | -1.75132  |
| 666 | France  | GBIF 2021 | 43.48019  | -1.51214  |
| 667 | France  | GBIF 2021 | 43.48021  | -1.51209  |
| 668 | France  | GBIF 2021 | 43.57262  | 2.44307   |
| 669 | France  | GBIF 2021 | 43.57263  | 2.44312   |
| 670 | France  | GBIF 2021 | 43.93354  | 3.31138   |
| 671 | France  | GBIF 2021 | 43.93356  | 3.31133   |
| 672 | France  | GBIF 2021 | 44.02931  | -1.30581  |
| 673 | France  | GBIF 2021 | 44.21861  | -1.06951  |
| 674 | France  | GBIF 2021 | 44.58724  | -0.84385  |
| 675 | France  | GBIF 2021 | 44.58726  | -0.8438   |
| 676 | France  | GBIF 2021 | 44.6727   | -0.97601  |
| 677 | France  | GBIF 2021 | 44.67272  | -0.97596  |
| 678 | France  | GBIF 2021 | 44.67716  | -0.84999  |
| 679 | France  | GBIF 2021 | 44.70091  | 6.09349   |
| 680 | France  | GBIF 2021 | 44.75801  | -1.10856  |
| 681 | France  | GBIF 2021 | 44.76262  | -0.98237  |
| 682 | France  | GBIF 2021 | 44.76264  | -0.98232  |
| 683 | France  | GBIF 2021 | 44.76709  | -0.85615  |
| 684 | France  | GBIF 2021 | 44.7671   | -0.8561   |
| 685 | France  | GBIF 2021 | 44.77141  | -0.72991  |
| 686 | France  | GBIF 2021 | 44.77143  | -0.72986  |
| 687 | France  | GBIF 2021 | 45.18905  | 4.08243   |
| 688 | France  | GBIF 2021 | 45.18907  | 4.08238   |
| 689 | France  | GBIF 2021 | 46.00382  | 3.45232   |
| 690 | France  | GBIF 2021 | 46.00384  | 3.45227   |
| 691 | France  | GBIF 2021 | 46.18436  | 3.32417   |
| 692 | France  | GBIF 2021 | 46.18437  | 3.32411   |
| 693 | France  | GBIF 2021 | 46.25219  | 5.27197   |

|     |        |           |           |          |
|-----|--------|-----------|-----------|----------|
| 694 | France | GBIF 2021 | 46.25221  | 5.27191  |
| 695 | France | GBIF 2021 | 46.63458  | 2.67315  |
| 696 | France | GBIF 2021 | 46.6346   | 2.6732   |
| 697 | France | GBIF 2021 | 46.98153  | 4.77623  |
| 698 | France | GBIF 2021 | 46.98155  | 4.77617  |
| 699 | France | GBIF 2021 | 47.26301  | 2.27258  |
| 700 | France | GBIF 2021 | 47.26303  | 2.27264  |
| 701 | France | GBIF 2021 | 47.323585 | 2.282615 |
| 702 | France | GBIF 2021 | 47.33219  | 5.31768  |
| 703 | France | GBIF 2021 | 47.33221  | 5.31762  |
| 704 | France | GBIF 2021 | 47.35303  | 2.27136  |
| 705 | France | GBIF 2021 | 47.35305  | 2.27142  |
| 706 | France | GBIF 2021 | 47.42717  | 5.05638  |
| 707 | France | GBIF 2021 | 47.42718  | 5.05633  |
| 708 | France | GBIF 2021 | 47.56     | -1.77    |
| 709 | France | GBIF 2021 | 47.58     | -1.76    |
| 710 | France | GBIF 2021 | 47.80383  | 2.39878  |
| 711 | France | GBIF 2021 | 47.80385  | 2.39884  |
| 712 | France | GBIF 2021 | 47.80444  | 2.53237  |
| 713 | France | GBIF 2021 | 47.80446  | 2.53243  |
| 714 | France | GBIF 2021 | 47.80492  | 2.66602  |
| 715 | France | GBIF 2021 | 47.83377  | 2.72596  |
| 716 | France | GBIF 2021 | 47.87934  | 1.05993  |
| 717 | France | GBIF 2021 | 47.87936  | 1.05999  |
| 718 | France | GBIF 2021 | 47.91436  | 7.08487  |
| 719 | France | GBIF 2021 | 47.91438  | 7.08482  |
| 720 | France | GBIF 2021 | 47.91854  | 1.09768  |
| 721 | France | GBIF 2021 | 47.98107  | 1.99464  |
| 722 | France | GBIF 2021 | 48.00423  | 7.09181  |
| 723 | France | GBIF 2021 | 48.00425  | 7.09175  |
| 724 | France | GBIF 2021 | 48.09869  | 6.96461  |
| 725 | France | GBIF 2021 | 48.10313  | 6.83043  |
| 726 | France | GBIF 2021 | 48.10742  | 6.69623  |
| 727 | France | GBIF 2021 | 48.10744  | 6.69618  |
| 728 | France | GBIF 2021 | 48.11936  | 6.29351  |
| 729 | France | GBIF 2021 | 48.11938  | 6.29345  |
| 730 | France | GBIF 2021 | 48.18396  | 7.10575  |
| 731 | France | GBIF 2021 | 48.18398  | 7.10569  |
| 732 | France | GBIF 2021 | 48.19301  | 6.83696  |
| 733 | France | GBIF 2021 | 48.28718  | 6.70885  |
| 734 | France | GBIF 2021 | 48.34481  | 2.66253  |

|     |             |           |            |           |
|-----|-------------|-----------|------------|-----------|
| 735 | France      | GBIF 2021 | 48.34483   | 2.66259   |
| 736 | France      | GBIF 2021 | 48.45351   | 7.12683   |
| 737 | France      | GBIF 2021 | 48.45353   | 7.12677   |
| 738 | France      | GBIF 2021 | 48.45813   | 6.99176   |
| 739 | France      | GBIF 2021 | 48.52289   | 2.25511   |
| 740 | France      | GBIF 2021 | 48.52291   | 2.25517   |
| 741 | France      | GBIF 2021 | 48.52845   | 2.27072   |
| 742 | France      | GBIF 2021 | 48.62838   | 7.27652   |
| 743 | France      | GBIF 2021 | 48.67217   | 2.52586   |
| 744 | France      | GBIF 2021 | 48.69814   | 1.70907   |
| 745 | France      | GBIF 2021 | 48.69816   | 1.70913   |
| 746 | France      | GBIF 2021 | 48.70417   | 2.52432   |
| 747 | France      | GBIF 2021 | 48.70419   | 2.52438   |
| 748 | France      | GBIF 2021 | 48.81746   | 7.01929   |
| 749 | France      | GBIF 2021 | 48.81748   | 7.01923   |
| 750 | France      | GBIF 2021 | 48.97748   | 7.57891   |
| 751 | France      | GBIF 2021 | 48.9775    | 7.57885   |
| 752 | France      | GBIF 2021 | 48.98261   | 7.44252   |
| 753 | France      | GBIF 2021 | 48.98263   | 7.44246   |
| 754 | France      | GBIF 2021 | 49.06195   | 7.72344   |
| 755 | France      | GBIF 2021 | 49.06725   | 7.58684   |
| 756 | France      | GBIF 2021 | 49.12459   | 2.69885   |
| 757 | France      | GBIF 2021 | 49.15428   | 2.65732   |
| 758 | France      | GBIF 2021 | 49.38334   | 1.09088   |
| 759 | France      | GBIF 2021 | 49.41014   | 1.14011   |
| 760 | France      | GBIF 2021 | 49.41016   | 1.14017   |
| 761 | France      | GBIF 2021 | 49.95308   | 4.6012    |
| 762 | Germany     | GBIF 2021 | 48.263583  | 8.186083  |
| 763 | Germany     | GBIF 2021 | 52.5188334 | 13.396869 |
| 764 | Netherlands | GBIF 2021 | 51.55      | 5.03      |
| 765 | Netherlands | GBIF 2021 | 51.559902  | 5.033984  |
| 766 | Netherlands | GBIF 2021 | 51.75      | 5.75      |
| 767 | Netherlands | GBIF 2021 | 51.9       | 5.6       |
| 768 | Netherlands | GBIF 2021 | 51.95      | 5.7       |
| 769 | Netherlands | GBIF 2021 | 52.0       | 5.5       |
| 770 | Netherlands | GBIF 2021 | 52.0       | 5.7       |
| 771 | Netherlands | GBIF 2021 | 52.015807  | 5.496456  |
| 772 | Netherlands | GBIF 2021 | 52.132633  | 5.291266  |
| 773 | Netherlands | GBIF 2021 | 52.2446819 | 5.1314775 |
| 774 | Netherlands | GBIF 2021 | 52.3       | 6.4       |
| 775 | Netherlands | GBIF 2021 | 52.45      | 6.4       |

|     |        |           |            |             |
|-----|--------|-----------|------------|-------------|
| 776 | Sweden | GBIF 2021 | 56.8990125 | 12.4948338  |
| 777 | Sweden | GBIF 2021 | 57.105638  | 12.2394832  |
| 778 | U.S.A. | GBIF 2021 | 27.7527225 | -97.4254941 |
| 779 | U.S.A. | GBIF 2021 | 28.34      | -81.5657    |
| 780 | U.S.A. | GBIF 2021 | 28.5892    | -81.2156    |
| 781 | U.S.A. | GBIF 2021 | 28.6008    | -81.1936    |
| 782 | U.S.A. | GBIF 2021 | 28.6033    | -81.1926    |
| 783 | U.S.A. | GBIF 2021 | 28.6039    | -81.1947    |
| 784 | U.S.A. | GBIF 2021 | 29.3913622 | -81.6386889 |
| 785 | U.S.A. | GBIF 2021 | 29.5083674 | -95.0961973 |
| 786 | U.S.A. | GBIF 2021 | 29.6436325 | -82.3549302 |
| 787 | U.S.A. | GBIF 2021 | 29.6516344 | -82.3248262 |
| 788 | U.S.A. | GBIF 2021 | 29.6579549 | -82.3017728 |
| 789 | U.S.A. | GBIF 2021 | 29.748264  | -95.5302569 |
| 790 | U.S.A. | GBIF 2021 | 29.8680014 | -95.1282643 |
| 791 | U.S.A. | GBIF 2021 | 30.1316001 | -94.0154541 |
| 792 | U.S.A. | GBIF 2021 | 30.1442725 | -94.0208318 |
| 793 | U.S.A. | GBIF 2021 | 30.1833011 | -93.6081415 |
| 794 | U.S.A. | GBIF 2021 | 30.20117   | -93.98636   |
| 795 | U.S.A. | GBIF 2021 | 30.20236   | -93.98689   |
| 796 | U.S.A. | GBIF 2021 | 30.2081594 | -93.2028444 |
| 797 | U.S.A. | GBIF 2021 | 30.2213763 | -95.4899883 |
| 798 | U.S.A. | GBIF 2021 | 30.232072  | -93.7456223 |
| 799 | U.S.A. | GBIF 2021 | 30.2381    | -95.48319   |
| 800 | U.S.A. | GBIF 2021 | 30.2381    | -95.48519   |
| 801 | U.S.A. | GBIF 2021 | 30.3118769 | -95.4560512 |
| 802 | U.S.A. | GBIF 2021 | 30.3169156 | -81.3972395 |
| 803 | U.S.A. | GBIF 2021 | 30.3321838 | -81.655651  |
| 804 | U.S.A. | GBIF 2021 | 30.34506   | -90.08427   |
| 805 | U.S.A. | GBIF 2021 | 30.360725  | -95.0760574 |
| 806 | U.S.A. | GBIF 2021 | 30.446667  | -86.906944  |
| 807 | U.S.A. | GBIF 2021 | 30.5463016 | -90.4848118 |
| 808 | U.S.A. | GBIF 2021 | 30.57205   | -94.40888   |
| 809 | U.S.A. | GBIF 2021 | 30.5771539 | -94.410493  |
| 810 | U.S.A. | GBIF 2021 | 30.6124261 | -93.8743461 |
| 811 | U.S.A. | GBIF 2021 | 30.63366   | -93.8284    |
| 812 | U.S.A. | GBIF 2021 | 30.6359081 | -93.822281  |
| 813 | U.S.A. | GBIF 2021 | 30.6604815 | -93.8926809 |
| 814 | U.S.A. | GBIF 2021 | 30.688848  | -94.4159842 |
| 815 | U.S.A. | GBIF 2021 | 30.691283  | -94.4131403 |
| 816 | U.S.A. | GBIF 2021 | 30.7443    | -94.43602   |

|     |        |           |            |              |
|-----|--------|-----------|------------|--------------|
| 817 | U.S.A. | GBIF 2021 | 30.774897  | -89.58685    |
| 818 | U.S.A. | GBIF 2021 | 30.7752011 | -94.4154758  |
| 819 | U.S.A. | GBIF 2021 | 30.89967   | -93.9247     |
| 820 | U.S.A. | GBIF 2021 | 30.9248845 | -94.0103987  |
| 821 | U.S.A. | GBIF 2021 | 30.9251869 | -88.5900235  |
| 822 | U.S.A. | GBIF 2021 | 30.9842977 | -91.9623327  |
| 823 | U.S.A. | GBIF 2021 | 30.9968249 | -94.8315286  |
| 824 | U.S.A. | GBIF 2021 | 30.9968565 | -94.8271527  |
| 825 | U.S.A. | GBIF 2021 | 30.9970006 | -94.8209562  |
| 826 | U.S.A. | GBIF 2021 | 30.9988012 | -92.6237529  |
| 827 | U.S.A. | GBIF 2021 | 31.01728   | -94.8341     |
| 828 | U.S.A. | GBIF 2021 | 31.0418561 | -92.5312493  |
| 829 | U.S.A. | GBIF 2021 | 31.1435194 | -93.260998   |
| 830 | U.S.A. | GBIF 2021 | 31.1465757 | -92.4973598  |
| 831 | U.S.A. | GBIF 2021 | 31.2479659 | -93.9743556  |
| 832 | U.S.A. | GBIF 2021 | 31.24856   | -93.96531    |
| 833 | U.S.A. | GBIF 2021 | 31.2750939 | -93.9899983  |
| 834 | U.S.A. | GBIF 2021 | 31.31135   | -94.82601    |
| 835 | U.S.A. | GBIF 2021 | 31.3226849 | -94.7782644  |
| 836 | U.S.A. | GBIF 2021 | 31.3382406 | -94.729097   |
| 837 | U.S.A. | GBIF 2021 | 31.3407403 | -93.846852   |
| 838 | U.S.A. | GBIF 2021 | 31.43999   | -94.84506    |
| 839 | U.S.A. | GBIF 2021 | 31.4465701 | -94.8721556  |
| 840 | U.S.A. | GBIF 2021 | 31.477155  | -100.4558437 |
| 841 | U.S.A. | GBIF 2021 | 31.5654441 | -91.4259495  |
| 842 | U.S.A. | GBIF 2021 | 31.6948467 | -102.4140754 |
| 843 | U.S.A. | GBIF 2021 | 31.819334  | -92.329862   |
| 844 | U.S.A. | GBIF 2021 | 31.9183685 | -91.2334884  |
| 845 | U.S.A. | GBIF 2021 | 31.9685988 | -99.9018131  |
| 846 | U.S.A. | GBIF 2021 | 32.0377132 | -80.8501103  |
| 847 | U.S.A. | GBIF 2021 | 32.0808989 | -81.091203   |
| 848 | U.S.A. | GBIF 2021 | 32.1656221 | -82.9000751  |
| 849 | U.S.A. | GBIF 2021 | 32.3512601 | -95.3010624  |
| 850 | U.S.A. | GBIF 2021 | 32.3520904 | -90.734824   |
| 851 | U.S.A. | GBIF 2021 | 32.3526456 | -90.877882   |
| 852 | U.S.A. | GBIF 2021 | 32.402844  | -97.121069   |
| 853 | U.S.A. | GBIF 2021 | 32.4084765 | -91.1867771  |
| 854 | U.S.A. | GBIF 2021 | 32.4518036 | -97.7339978  |
| 855 | U.S.A. | GBIF 2021 | 32.4710847 | -97.7112457  |
| 856 | U.S.A. | GBIF 2021 | 32.5251516 | -93.7501789  |
| 857 | U.S.A. | GBIF 2021 | 32.5279235 | -94.8613258  |

|     |        |           |            |             |
|-----|--------|-----------|------------|-------------|
| 858 | U.S.A. | GBIF 2021 | 32.5530835 | -94.3864829 |
| 859 | U.S.A. | GBIF 2021 | 32.585867  | -85.449661  |
| 860 | U.S.A. | GBIF 2021 | 32.7400658 | -97.3267365 |
| 861 | U.S.A. | GBIF 2021 | 32.7493915 | -97.8005122 |
| 862 | U.S.A. | GBIF 2021 | 32.755252  | -97.338136  |
| 863 | U.S.A. | GBIF 2021 | 32.7951634 | -97.3118145 |
| 864 | U.S.A. | GBIF 2021 | 32.8595171 | -97.3649114 |
| 865 | U.S.A. | GBIF 2021 | 32.8805489 | -96.5663419 |
| 866 | U.S.A. | GBIF 2021 | 33.0074255 | -94.6443752 |
| 867 | U.S.A. | GBIF 2021 | 33.1567863 | -94.968269  |
| 868 | U.S.A. | GBIF 2021 | 33.6255234 | -91.3945566 |
| 869 | U.S.A. | GBIF 2021 | 33.7123305 | -84.1051939 |
| 870 | U.S.A. | GBIF 2021 | 33.836081  | -81.1637245 |
| 871 | U.S.A. | GBIF 2021 | 34.145148  | -81.275653  |
| 872 | U.S.A. | GBIF 2021 | 34.5003918 | -94.5004891 |
| 873 | U.S.A. | GBIF 2021 | 34.5072341 | -97.1106313 |
| 874 | U.S.A. | GBIF 2021 | 34.6915509 | -77.0630033 |
| 875 | U.S.A. | GBIF 2021 | 34.720556  | -76.936667  |
| 876 | U.S.A. | GBIF 2021 | 34.8350273 | -95.3108691 |
| 877 | U.S.A. | GBIF 2021 | 34.835035  | -95.3102505 |
| 878 | U.S.A. | GBIF 2021 | 34.9027286 | -83.3789389 |
| 879 | U.S.A. | GBIF 2021 | 34.950932  | -95.0802398 |
| 880 | U.S.A. | GBIF 2021 | 35.0077519 | -97.092877  |
| 881 | U.S.A. | GBIF 2021 | 35.2626635 | -77.5816353 |
| 882 | U.S.A. | GBIF 2021 | 35.2666027 | -78.037528  |
| 883 | U.S.A. | GBIF 2021 | 35.2876077 | -84.9462743 |
| 884 | U.S.A. | GBIF 2021 | 35.3523026 | -88.9525607 |
| 885 | U.S.A. | GBIF 2021 | 35.362855  | -84.294087  |
| 886 | U.S.A. | GBIF 2021 | 35.3678883 | -82.7584611 |
| 887 | U.S.A. | GBIF 2021 | 35.4306712 | -82.5012316 |
| 888 | U.S.A. | GBIF 2021 | 35.471793  | -84.2278796 |
| 889 | U.S.A. | GBIF 2021 | 35.5174913 | -86.5804473 |
| 890 | U.S.A. | GBIF 2021 | 35.5950581 | -82.5514869 |
| 891 | U.S.A. | GBIF 2021 | 35.6384597 | -97.5013693 |
| 892 | U.S.A. | GBIF 2021 | 35.67825   | -85.77734   |
| 893 | U.S.A. | GBIF 2021 | 35.6865889 | -85.7801453 |
| 894 | U.S.A. | GBIF 2021 | 35.77194   | -78.63889   |
| 895 | U.S.A. | GBIF 2021 | 35.7795897 | -78.6381787 |
| 896 | U.S.A. | GBIF 2021 | 35.79154   | -78.7811169 |
| 897 | U.S.A. | GBIF 2021 | 36.0726354 | -79.7919754 |
| 898 | U.S.A. | GBIF 2021 | 36.5297706 | -87.3594528 |

|     |        |           |            |             |
|-----|--------|-----------|------------|-------------|
| 899 | U.S.A. | GBIF 2021 | 36.6431638 | -80.1486151 |
| 900 | U.S.A. | GBIF 2021 | 36.82      | -90.872     |
| 901 | U.S.A. | GBIF 2021 | 36.8507689 | -76.2858726 |
| 902 | U.S.A. | GBIF 2021 | 36.8529263 | -75.977985  |
| 903 | U.S.A. | GBIF 2021 | 36.9229159 | -80.0133712 |
| 904 | U.S.A. | GBIF 2021 | 36.985089  | -76.4179638 |
| 905 | U.S.A. | GBIF 2021 | 37.051     | -91.322     |
| 906 | U.S.A. | GBIF 2021 | 37.051     | -91.388     |
| 907 | U.S.A. | GBIF 2021 | 37.0870821 | -76.4730122 |
| 908 | U.S.A. | GBIF 2021 | 37.09024   | -95.712891  |
| 909 | U.S.A. | GBIF 2021 | 37.1289771 | -84.0832646 |
| 910 | U.S.A. | GBIF 2021 | 37.2295733 | -80.4139393 |
| 911 | U.S.A. | GBIF 2021 | 37.2683802 | -93.1171264 |
| 912 | U.S.A. | GBIF 2021 | 37.2709704 | -79.9414266 |
| 913 | U.S.A. | GBIF 2021 | 37.317     | -89.917     |
| 914 | U.S.A. | GBIF 2021 | 37.3529172 | -79.6164232 |
| 915 | U.S.A. | GBIF 2021 | 37.3673217 | -77.6077865 |
| 916 | U.S.A. | GBIF 2021 | 37.4128281 | -76.5025742 |
| 917 | U.S.A. | GBIF 2021 | 37.4315734 | -78.6568942 |
| 918 | U.S.A. | GBIF 2021 | 37.4653757 | -76.964306  |
| 919 | U.S.A. | GBIF 2021 | 37.5234001 | -77.3158452 |
| 920 | U.S.A. | GBIF 2021 | 37.5407246 | -77.4360481 |
| 921 | U.S.A. | GBIF 2021 | 37.718624  | -76.895267  |
| 922 | U.S.A. | GBIF 2021 | 37.7372121 | -77.1485163 |
| 923 | U.S.A. | GBIF 2021 | 37.7590318 | -77.4799837 |
| 924 | U.S.A. | GBIF 2021 | 37.7592831 | -81.0767626 |
| 925 | U.S.A. | GBIF 2021 | 37.78316   | -94.82462   |
| 926 | U.S.A. | GBIF 2021 | 37.828     | -90.26      |
| 927 | U.S.A. | GBIF 2021 | 37.877562  | -79.221286  |
| 928 | U.S.A. | GBIF 2021 | 37.9642529 | -91.8318334 |
| 929 | U.S.A. | GBIF 2021 | 37.9883991 | -85.7157924 |
| 930 | U.S.A. | GBIF 2021 | 38.0405837 | -84.5037164 |
| 931 | U.S.A. | GBIF 2021 | 38.0695815 | -78.700575  |
| 932 | U.S.A. | GBIF 2021 | 38.0990233 | -78.9691923 |
| 933 | U.S.A. | GBIF 2021 | 38.1050689 | -85.7588502 |
| 934 | U.S.A. | GBIF 2021 | 38.2372863 | -77.1485163 |
| 935 | U.S.A. | GBIF 2021 | 38.2556905 | -81.4278984 |
| 936 | U.S.A. | GBIF 2021 | 38.5976262 | -80.4549026 |
| 937 | U.S.A. | GBIF 2021 | 38.647896  | -78.6714064 |
| 938 | U.S.A. | GBIF 2021 | 38.6764777 | -81.6601279 |
| 939 | U.S.A. | GBIF 2021 | 38.741533  | -75.412181  |

|     |        |           |            |              |
|-----|--------|-----------|------------|--------------|
| 940 | U.S.A. | GBIF 2021 | 38.861065  | -82.9931607  |
| 941 | U.S.A. | GBIF 2021 | 38.9517053 | -92.3340724  |
| 942 | U.S.A. | GBIF 2021 | 38.9531162 | -77.4565388  |
| 943 | U.S.A. | GBIF 2021 | 38.9833489 | -93.5685464  |
| 944 | U.S.A. | GBIF 2021 | 38.9917797 | -74.8148894  |
| 945 | U.S.A. | GBIF 2021 | 39.0348317 | -76.9074739  |
| 946 | U.S.A. | GBIF 2021 | 39.0634129 | -81.3951198  |
| 947 | U.S.A. | GBIF 2021 | 39.0997265 | -94.5785667  |
| 948 | U.S.A. | GBIF 2021 | 39.1287189 | -79.4647739  |
| 949 | U.S.A. | GBIF 2021 | 39.2587106 | -75.0611147  |
| 950 | U.S.A. | GBIF 2021 | 39.2728826 | -79.3644902  |
| 951 | U.S.A. | GBIF 2021 | 39.2806451 | -80.3445341  |
| 952 | U.S.A. | GBIF 2021 | 39.2903848 | -76.6121893  |
| 953 | U.S.A. | GBIF 2021 | 39.3473586 | -76.6542664  |
| 954 | U.S.A. | GBIF 2021 | 39.3839884 | -78.1555579  |
| 955 | U.S.A. | GBIF 2021 | 39.39155   | -104.75258   |
| 956 | U.S.A. | GBIF 2021 | 39.391764  | -104.752337  |
| 957 | U.S.A. | GBIF 2021 | 39.4020332 | -80.0353533  |
| 958 | U.S.A. | GBIF 2021 | 39.40868   | -94.96513    |
| 959 | U.S.A. | GBIF 2021 | 39.40954   | -94.96623    |
| 960 | U.S.A. | GBIF 2021 | 39.4512859 | -75.1930977  |
| 961 | U.S.A. | GBIF 2021 | 39.4553636 | -80.1417454  |
| 962 | U.S.A. | GBIF 2021 | 39.4631408 | -80.4075888  |
| 963 | U.S.A. | GBIF 2021 | 39.4711967 | -80.0950761  |
| 964 | U.S.A. | GBIF 2021 | 39.479807  | -80.1686906  |
| 965 | U.S.A. | GBIF 2021 | 39.4956403 | -80.0931308  |
| 966 | U.S.A. | GBIF 2021 | 39.500084  | -80.1961916  |
| 967 | U.S.A. | GBIF 2021 | 39.5403331 | -80.1428126  |
| 968 | U.S.A. | GBIF 2021 | 39.5500507 | -105.7820674 |
| 969 | U.S.A. | GBIF 2021 | 39.601504  | -75.0671196  |
| 970 | U.S.A. | GBIF 2021 | 39.6023092 | -79.2233674  |
| 971 | U.S.A. | GBIF 2021 | 39.6070265 | -79.8920056  |
| 972 | U.S.A. | GBIF 2021 | 39.6269902 | -78.2271957  |
| 973 | U.S.A. | GBIF 2021 | 39.675667  | -104.885591  |
| 974 | U.S.A. | GBIF 2021 | 39.7035249 | -78.5698598  |
| 975 | U.S.A. | GBIF 2021 | 39.7826095 | -75.8754973  |
| 976 | U.S.A. | GBIF 2021 | 39.792614  | -104.977847  |
| 977 | U.S.A. | GBIF 2021 | 39.9348    | -77.3223     |
| 978 | U.S.A. | GBIF 2021 | 39.9383152 | -75.446089   |
| 979 | U.S.A. | GBIF 2021 | 39.9765751 | -95.0216216  |
| 980 | U.S.A. | GBIF 2021 | 39.9991865 | -78.2388071  |



|      |        |           |            |              |
|------|--------|-----------|------------|--------------|
| 981  | U.S.A. | GBIF 2021 | 40.0207646 | -79.1715288  |
| 982  | U.S.A. | GBIF 2021 | 40.0583238 | -74.4056612  |
| 983  | U.S.A. | GBIF 2021 | 40.0994425 | -74.9325683  |
| 984  | U.S.A. | GBIF 2021 | 40.1100719 | -80.1747806  |
| 985  | U.S.A. | GBIF 2021 | 40.1340316 | -74.5236865  |
| 986  | U.S.A. | GBIF 2021 | 40.1634279 | -76.3949614  |
| 987  | U.S.A. | GBIF 2021 | 40.1778886 | -74.5834887  |
| 988  | U.S.A. | GBIF 2021 | 40.181602  | -76.58556    |
| 989  | U.S.A. | GBIF 2021 | 40.1879504 | -75.4354883  |
| 990  | U.S.A. | GBIF 2021 | 40.1988475 | -105.2492646 |
| 991  | U.S.A. | GBIF 2021 | 40.2010241 | -77.2002745  |
| 992  | U.S.A. | GBIF 2021 | 40.220088  | -74.3903     |
| 993  | U.S.A. | GBIF 2021 | 40.22466   | -76.9634     |
| 994  | U.S.A. | GBIF 2021 | 40.2686013 | -77.5848665  |
| 995  | U.S.A. | GBIF 2021 | 40.2926016 | -79.9975916  |
| 996  | U.S.A. | GBIF 2021 | 40.2973319 | -74.3582041  |
| 997  | U.S.A. | GBIF 2021 | 40.3101063 | -75.1298939  |
| 998  | U.S.A. | GBIF 2021 | 40.3949309 | -77.7168299  |
| 999  | U.S.A. | GBIF 2021 | 40.4172871 | -82.907123   |
| 1000 | U.S.A. | GBIF 2021 | 40.4190716 | -76.5965     |
| 1001 | U.S.A. | GBIF 2021 | 40.439447  | -79.992856   |
| 1002 | U.S.A. | GBIF 2021 | 40.4525163 | -74.4766712  |
| 1003 | U.S.A. | GBIF 2021 | 40.4862157 | -74.4518188  |
| 1004 | U.S.A. | GBIF 2021 | 40.5106322 | -74.6472522  |
| 1005 | U.S.A. | GBIF 2021 | 40.5200635 | -82.0973748  |
| 1006 | U.S.A. | GBIF 2021 | 40.5736942 | -74.1184675  |
| 1007 | U.S.A. | GBIF 2021 | 40.5828697 | -74.9584954  |
| 1008 | U.S.A. | GBIF 2021 | 40.6725024 | -73.916862   |
| 1009 | U.S.A. | GBIF 2021 | 40.7010204 | -73.9481277  |
| 1010 | U.S.A. | GBIF 2021 | 40.7065616 | -74.0037097  |
| 1011 | U.S.A. | GBIF 2021 | 40.7098744 | -74.0154317  |
| 1012 | U.S.A. | GBIF 2021 | 40.7100491 | -74.007383   |
| 1013 | U.S.A. | GBIF 2021 | 40.7127753 | -74.0059728  |
| 1014 | U.S.A. | GBIF 2021 | 40.7298207 | -73.2103934  |
| 1015 | U.S.A. | GBIF 2021 | 40.7341691 | -73.9826815  |
| 1016 | U.S.A. | GBIF 2021 | 40.759004  | -73.739866   |
| 1017 | U.S.A. | GBIF 2021 | 40.759853  | -73.74009    |
| 1018 | U.S.A. | GBIF 2021 | 40.793395  | -77.860001   |
| 1019 | U.S.A. | GBIF 2021 | 40.8447819 | -73.8648268  |
| 1020 | U.S.A. | GBIF 2021 | 40.8467657 | -73.5351245  |
| 1021 | U.S.A. | GBIF 2021 | 40.9045084 | -80.0464473  |

|      |        |           |                    |                    |
|------|--------|-----------|--------------------|--------------------|
| 1022 | U.S.A. | GBIF 2021 | 40.9552            | -75.4371           |
| 1023 | U.S.A. | GBIF 2021 | 40.97163           | -80.11844          |
| 1024 | U.S.A. | GBIF 2021 | 41.0111103         | -95.8808424        |
| 1025 | U.S.A. | GBIF 2021 | 41.04422           | -83.6499321        |
| 1026 | U.S.A. | GBIF 2021 | 41.084263          | -74.0556966        |
| 1027 | U.S.A. | GBIF 2021 | 41.0997803         | -80.6495194        |
| 1028 | U.S.A. | GBIF 2021 | 41.1361372         | -81.7302102        |
| 1029 | U.S.A. | GBIF 2021 | 41.2033216         | -77.1945247        |
| 1030 | U.S.A. | GBIF 2021 | 41.208442          | -73.57482          |
| 1031 | U.S.A. | GBIF 2021 | 41.2542459         | -76.9205199        |
| 1032 | U.S.A. | GBIF 2021 | 41.2617481         | -75.8968635        |
| 1033 | U.S.A. | GBIF 2021 | 41.3581172         | -78.2672332        |
| 1034 | U.S.A. | GBIF 2021 | 41.3890052         | -70.5133599        |
| 1035 | U.S.A. | GBIF 2021 | 41.3978358         | -79.8314437        |
| 1036 | U.S.A. | GBIF 2021 | 41.4727378         | -76.2942507        |
| 1037 | U.S.A. | GBIF 2021 | 41.48              | -81.34             |
| 1038 | U.S.A. | GBIF 2021 | 41.49932           | -81.6943605        |
| 1039 | U.S.A. | GBIF 2021 | 41.5034271         | -74.0104178        |
| 1040 | U.S.A. | GBIF 2021 | 41.504253          | -78.219806         |
| 1041 | U.S.A. | GBIF 2021 | 41.5299559         | -75.2164296        |
| 1042 | U.S.A. | GBIF 2021 | 41.5750676         | -71.5351476        |
| 1043 | U.S.A. | GBIF 2021 | 41.5767602         | -74.4871031        |
| 1044 | U.S.A. | GBIF 2021 | 41.6032207         | -73.087749         |
| 1045 | U.S.A. | GBIF 2021 | 41.7170379         | -74.3957099        |
| 1046 | U.S.A. | GBIF 2021 | 41.7711633         | -81.049819         |
| 1047 | U.S.A. | GBIF 2021 | 41.7834087         | -76.0463137        |
| 1048 | U.S.A. | GBIF 2021 | 41.82              | -81.04             |
| 1049 | U.S.A. | GBIF 2021 | 41.82              | -81.05             |
| 1050 | U.S.A. | GBIF 2021 | 41.879134999062195 | -83.68995699999999 |
| 1051 | U.S.A. | GBIF 2021 | 41.8791349990622   | -83.689957         |
| 1052 | U.S.A. | GBIF 2021 | 41.9042867         | -85.7988714        |
| 1053 | U.S.A. | GBIF 2021 | 41.9848458         | -84.3476165        |
| 1054 | U.S.A. | GBIF 2021 | 42.0105122         | -83.202408         |
| 1055 | U.S.A. | GBIF 2021 | 42.0399825         | -75.7968698        |
| 1056 | U.S.A. | GBIF 2021 | 42.06038499906157  | -84.141481         |
| 1057 | U.S.A. | GBIF 2021 | 42.0603849990616   | -84.141481         |
| 1058 | U.S.A. | GBIF 2021 | 42.0653812         | -71.2478251        |
| 1059 | U.S.A. | GBIF 2021 | 42.0698822         | -80.1651854        |
| 1060 | U.S.A. | GBIF 2021 | 42.1084122         | -72.0787059        |
| 1061 | U.S.A. | GBIF 2021 | 42.1417442         | -71.2495096        |
| 1062 | U.S.A. | GBIF 2021 | 42.156626          | -77.1255055        |

|      |        |           |                   |                    |
|------|--------|-----------|-------------------|--------------------|
| 1063 | U.S.A. | GBIF 2021 | 42.1745334        | -74.0201355        |
| 1064 | U.S.A. | GBIF 2021 | 42.1764362        | -84.3542049        |
| 1065 | U.S.A. | GBIF 2021 | 42.192104         | -83.2896482        |
| 1066 | U.S.A. | GBIF 2021 | 42.199131         | -74.041072         |
| 1067 | U.S.A. | GBIF 2021 | 42.2380181        | -75.8463022        |
| 1068 | U.S.A. | GBIF 2021 | 42.2389857        | -71.3697813        |
| 1069 | U.S.A. | GBIF 2021 | 42.248487         | -84.423438         |
| 1070 | U.S.A. | GBIF 2021 | 42.249228         | -78.9592052        |
| 1071 | U.S.A. | GBIF 2021 | 42.2780436        | -83.7382241        |
| 1072 | U.S.A. | GBIF 2021 | 42.279286         | -71.4161565        |
| 1073 | U.S.A. | GBIF 2021 | 42.2809285        | -71.2377548        |
| 1074 | U.S.A. | GBIF 2021 | 42.3484207        | -73.0151011        |
| 1075 | U.S.A. | GBIF 2021 | 42.362669         | -85.356061         |
| 1076 | U.S.A. | GBIF 2021 | 42.3792459        | -76.0623979        |
| 1077 | U.S.A. | GBIF 2021 | 42.4072107        | -71.3824374        |
| 1078 | U.S.A. | GBIF 2021 | 42.4153596        | -74.0220769        |
| 1079 | U.S.A. | GBIF 2021 | 42.4500845        | -73.2453824        |
| 1080 | U.S.A. | GBIF 2021 | 42.4703676        | -85.7885885        |
| 1081 | U.S.A. | GBIF 2021 | 42.479477         | -71.39651          |
| 1082 | U.S.A. | GBIF 2021 | 42.4959288        | -71.0197738        |
| 1083 | U.S.A. | GBIF 2021 | 42.5013612        | -83.8356197        |
| 1084 | U.S.A. | GBIF 2021 | 42.505999990602   | -83.8567           |
| 1085 | U.S.A. | GBIF 2021 | 42.5168908        | -76.5880144        |
| 1086 | U.S.A. | GBIF 2021 | 42.5250906        | -71.759794         |
| 1087 | U.S.A. | GBIF 2021 | 42.5584218        | -71.2689461        |
| 1088 | U.S.A. | GBIF 2021 | 42.5590999906005  | -83.552578         |
| 1089 | U.S.A. | GBIF 2021 | 42.559099990601   | -83.552578         |
| 1090 | U.S.A. | GBIF 2021 | 42.5601082        | -83.5519395        |
| 1091 | U.S.A. | GBIF 2021 | 42.605629         | -71.615987         |
| 1092 | U.S.A. | GBIF 2021 | 42.6072552        | -83.9293952        |
| 1093 | U.S.A. | GBIF 2021 | 42.6167799990599  | -83.9281           |
| 1094 | U.S.A. | GBIF 2021 | 42.61677999905991 | -83.92810000000001 |
| 1095 | U.S.A. | GBIF 2021 | 42.6334247        | -71.3161718        |
| 1096 | U.S.A. | GBIF 2021 | 42.6550248        | -86.2019825        |
| 1097 | U.S.A. | GBIF 2021 | 42.6583356        | -71.1367953        |
| 1098 | U.S.A. | GBIF 2021 | 42.6766696        | -71.4244224        |
| 1099 | U.S.A. | GBIF 2021 | 42.697013         | -84.42321          |
| 1100 | U.S.A. | GBIF 2021 | 42.7009999905968  | -86.19600000000001 |
| 1101 | U.S.A. | GBIF 2021 | 42.700999990597   | -86.196            |
| 1102 | U.S.A. | GBIF 2021 | 42.701848         | -84.4821719        |
| 1103 | U.S.A. | GBIF 2021 | 42.7092868        | -83.0703388        |

|      |        |           |                    |                    |
|------|--------|-----------|--------------------|--------------------|
| 1104 | U.S.A. | GBIF 2021 | 42.7156999990596   | -84.5224           |
| 1105 | U.S.A. | GBIF 2021 | 42.715699999059645 | -84.5224           |
| 1106 | U.S.A. | GBIF 2021 | 42.717779          | -84.5150649        |
| 1107 | U.S.A. | GBIF 2021 | 42.7256184         | -77.8741694        |
| 1108 | U.S.A. | GBIF 2021 | 42.732535          | -84.5555347        |
| 1109 | U.S.A. | GBIF 2021 | 42.7369792         | -84.4838654        |
| 1110 | U.S.A. | GBIF 2021 | 42.73772999905959  | -84.06436          |
| 1111 | U.S.A. | GBIF 2021 | 42.7377299990596   | -84.06436          |
| 1112 | U.S.A. | GBIF 2021 | 42.7502495         | -103.0012944       |
| 1113 | U.S.A. | GBIF 2021 | 42.7533685         | -84.7463757        |
| 1114 | U.S.A. | GBIF 2021 | 42.764757          | -82.934164         |
| 1115 | U.S.A. | GBIF 2021 | 42.7870209         | -73.9709583        |
| 1116 | U.S.A. | GBIF 2021 | 42.808445          | -78.133638         |
| 1117 | U.S.A. | GBIF 2021 | 42.8249023         | -82.4903367        |
| 1118 | U.S.A. | GBIF 2021 | 42.8249167         | -82.4903341        |
| 1119 | U.S.A. | GBIF 2021 | 42.8374494         | -82.487913         |
| 1120 | U.S.A. | GBIF 2021 | 42.8384221         | -71.1470037        |
| 1121 | U.S.A. | GBIF 2021 | 42.8509152         | -72.5578678        |
| 1122 | U.S.A. | GBIF 2021 | 42.8679836         | -76.985557         |
| 1123 | U.S.A. | GBIF 2021 | 42.9011708         | -78.3886312        |
| 1124 | U.S.A. | GBIF 2021 | 42.9026136         | -78.744572         |
| 1125 | U.S.A. | GBIF 2021 | 42.9084012         | -75.6607387        |
| 1126 | U.S.A. | GBIF 2021 | 42.9266565         | -90.623182         |
| 1127 | U.S.A. | GBIF 2021 | 42.9336426         | -85.3419609        |
| 1128 | U.S.A. | GBIF 2021 | 42.9486611         | -85.4824841        |
| 1129 | U.S.A. | GBIF 2021 | 42.960999999059    | -85.309            |
| 1130 | U.S.A. | GBIF 2021 | 42.96099999905904  | -85.3089999999998  |
| 1131 | U.S.A. | GBIF 2021 | 42.9633599         | -85.6680863        |
| 1132 | U.S.A. | GBIF 2021 | 43.0140573         | -83.6891648        |
| 1133 | U.S.A. | GBIF 2021 | 43.0140787         | -83.689118         |
| 1134 | U.S.A. | GBIF 2021 | 43.03579999905889  | -85.49090000000001 |
| 1135 | U.S.A. | GBIF 2021 | 43.0357999990589   | -85.4909           |
| 1136 | U.S.A. | GBIF 2021 | 43.0379961         | -70.8695618        |
| 1137 | U.S.A. | GBIF 2021 | 43.0517441         | -70.8175001        |
| 1138 | U.S.A. | GBIF 2021 | 43.0539179         | -85.4697477        |
| 1139 | U.S.A. | GBIF 2021 | 43.0598206         | -75.9648832        |
| 1140 | U.S.A. | GBIF 2021 | 43.072602999058795 | -82.626496         |
| 1141 | U.S.A. | GBIF 2021 | 43.0726029990588   | -82.626496         |
| 1142 | U.S.A. | GBIF 2021 | 43.072603          | -82.626496         |
| 1143 | U.S.A. | GBIF 2021 | 43.0844679         | -82.4865581        |
| 1144 | U.S.A. | GBIF 2021 | 43.0887243         | -83.528342         |

|      |        |           |                    |                    |
|------|--------|-----------|--------------------|--------------------|
| 1145 | U.S.A. | GBIF 2021 | 43.1006099990587   | -83.55581          |
| 1146 | U.S.A. | GBIF 2021 | 43.10060999905875  | -83.55581000000001 |
| 1147 | U.S.A. | GBIF 2021 | 43.100903          | -75.232664         |
| 1148 | U.S.A. | GBIF 2021 | 43.1009037         | -74.772927         |
| 1149 | U.S.A. | GBIF 2021 | 43.1339545         | -70.9264393        |
| 1150 | U.S.A. | GBIF 2021 | 43.1938516         | -71.5723953        |
| 1151 | U.S.A. | GBIF 2021 | 43.2128473         | -75.4557303        |
| 1152 | U.S.A. | GBIF 2021 | 43.2341813         | -86.2483921        |
| 1153 | U.S.A. | GBIF 2021 | 43.2421309990584   | -86.345715         |
| 1154 | U.S.A. | GBIF 2021 | 43.242130999058446 | -86.345715         |
| 1155 | U.S.A. | GBIF 2021 | 43.2994285         | -74.2179326        |
| 1156 | U.S.A. | GBIF 2021 | 43.3025127         | -73.6546653        |
| 1157 | U.S.A. | GBIF 2021 | 43.3647519990582   | -82.617744         |
| 1158 | U.S.A. | GBIF 2021 | 43.36475199905822  | -82.617744         |
| 1159 | U.S.A. | GBIF 2021 | 43.4069041         | -82.7347142        |
| 1160 | U.S.A. | GBIF 2021 | 43.443312          | -82.645754         |
| 1161 | U.S.A. | GBIF 2021 | 43.45512999905805  | -84.72758          |
| 1162 | U.S.A. | GBIF 2021 | 43.4551299990581   | -84.72758          |
| 1163 | U.S.A. | GBIF 2021 | 43.4670156         | -85.1454515        |
| 1164 | U.S.A. | GBIF 2021 | 43.470328999058    | -86.267185         |
| 1165 | U.S.A. | GBIF 2021 | 43.47032899905803  | -86.26718499999998 |
| 1166 | U.S.A. | GBIF 2021 | 43.482533          | -76.1783739        |
| 1167 | U.S.A. | GBIF 2021 | 43.48924599905799  | -85.554437         |
| 1168 | U.S.A. | GBIF 2021 | 43.489245999058    | -85.554437         |
| 1169 | U.S.A. | GBIF 2021 | 43.4972896         | -74.3618105        |
| 1170 | U.S.A. | GBIF 2021 | 43.5350639         | -84.1325864        |
| 1171 | U.S.A. | GBIF 2021 | 43.5487519990579   | -83.077724         |
| 1172 | U.S.A. | GBIF 2021 | 43.5487519990579   | -85.65228399999998 |
| 1173 | U.S.A. | GBIF 2021 | 43.5487519990579   | -85.652284         |
| 1174 | U.S.A. | GBIF 2021 | 43.5648623         | -72.9660655        |
| 1175 | U.S.A. | GBIF 2021 | 43.595833          | -82.857222         |
| 1176 | U.S.A. | GBIF 2021 | 43.6141668         | -71.0054993        |
| 1177 | U.S.A. | GBIF 2021 | 43.6155825         | -84.2472116        |
| 1178 | U.S.A. | GBIF 2021 | 43.6414716         | -70.2408811        |
| 1179 | U.S.A. | GBIF 2021 | 43.6698799990577   | -84.58771          |
| 1180 | U.S.A. | GBIF 2021 | 43.66987999905771  | -84.58770999999999 |
| 1181 | U.S.A. | GBIF 2021 | 43.671             | -82.774            |
| 1182 | U.S.A. | GBIF 2021 | 43.6778491         | -86.4232715        |
| 1183 | U.S.A. | GBIF 2021 | 43.6839337         | -85.8607141        |
| 1184 | U.S.A. | GBIF 2021 | 43.7022451         | -72.2895526        |
| 1185 | U.S.A. | GBIF 2021 | 43.7126985         | -71.4914747        |

|      |        |           |                    |                    |
|------|--------|-----------|--------------------|--------------------|
| 1186 | U.S.A. | GBIF 2021 | 43.7128792         | -85.8496274        |
| 1187 | U.S.A. | GBIF 2021 | 43.7136555         | -85.7008102        |
| 1188 | U.S.A. | GBIF 2021 | 43.7588577         | -70.398706         |
| 1189 | U.S.A. | GBIF 2021 | 43.76667           | -103.59833         |
| 1190 | U.S.A. | GBIF 2021 | 43.8015019990575   | -82.907658         |
| 1191 | U.S.A. | GBIF 2021 | 43.80150199905752  | -82.907658         |
| 1192 | U.S.A. | GBIF 2021 | 43.8194703         | -84.7686281        |
| 1193 | U.S.A. | GBIF 2021 | 43.8343            | -72.24841          |
| 1194 | U.S.A. | GBIF 2021 | 43.8884839990574   | -85.348974         |
| 1195 | U.S.A. | GBIF 2021 | 43.888483999057414 | -85.34897400000001 |
| 1196 | U.S.A. | GBIF 2021 | 43.89044           | -72.22562          |
| 1197 | U.S.A. | GBIF 2021 | 43.89275           | -72.49469          |
| 1198 | U.S.A. | GBIF 2021 | 43.9552825         | -86.4525831        |
| 1199 | U.S.A. | GBIF 2021 | 43.969246          | -70.5211945        |
| 1200 | U.S.A. | GBIF 2021 | 43.9695148         | -99.9018131        |
| 1201 | U.S.A. | GBIF 2021 | 43.97602           | -72.44552          |
| 1202 | U.S.A. | GBIF 2021 | 43.98239           | -72.13262          |
| 1203 | U.S.A. | GBIF 2021 | 43.98878           | -84.498715         |
| 1204 | U.S.A. | GBIF 2021 | 43.98966           | -73.30861          |
| 1205 | U.S.A. | GBIF 2021 | 43.99136           | -72.40146          |
| 1206 | U.S.A. | GBIF 2021 | 43.99597           | -72.62386          |
| 1207 | U.S.A. | GBIF 2021 | 43.9964219990573   | -83.077724         |
| 1208 | U.S.A. | GBIF 2021 | 43.996421999057304 | -83.077724         |
| 1209 | U.S.A. | GBIF 2021 | 43.9973355         | -83.6773928        |
| 1210 | U.S.A. | GBIF 2021 | 44.01692999905727  | -84.295588         |
| 1211 | U.S.A. | GBIF 2021 | 44.0169299990573   | -84.295588         |
| 1212 | U.S.A. | GBIF 2021 | 44.01916699905726  | -86.51305600000002 |
| 1213 | U.S.A. | GBIF 2021 | 44.0191669990573   | -86.513056         |
| 1214 | U.S.A. | GBIF 2021 | 44.03458           | -72.09068          |
| 1215 | U.S.A. | GBIF 2021 | 44.0369            | -73.00305          |
| 1216 | U.S.A. | GBIF 2021 | 44.087685          | -84.861674         |
| 1217 | U.S.A. | GBIF 2021 | 44.0978509         | -70.2311655        |
| 1218 | U.S.A. | GBIF 2021 | 44.100351          | -70.2147764        |
| 1219 | U.S.A. | GBIF 2021 | 44.101008          | -84.157787         |
| 1220 | U.S.A. | GBIF 2021 | 44.11063           | -72.61166          |
| 1221 | U.S.A. | GBIF 2021 | 44.1333912         | -73.0790076        |
| 1222 | U.S.A. | GBIF 2021 | 44.1620939990571   | -84.904324         |
| 1223 | U.S.A. | GBIF 2021 | 44.162093999057134 | -84.90432399999999 |
| 1224 | U.S.A. | GBIF 2021 | 44.16633           | -72.42474          |
| 1225 | U.S.A. | GBIF 2021 | 44.1752378         | -84.0551693        |
| 1226 | U.S.A. | GBIF 2021 | 44.2042479         | -73.9932333        |

|      |        |           |                   |                    |
|------|--------|-----------|-------------------|--------------------|
| 1227 | U.S.A. | GBIF 2021 | 44.2058259990571  | -83.603006         |
| 1228 | U.S.A. | GBIF 2021 | 44.2130042        | -86.272921         |
| 1229 | U.S.A. | GBIF 2021 | 44.2141211        | -86.2741118        |
| 1230 | U.S.A. | GBIF 2021 | 44.2219663        | -74.8350277        |
| 1231 | U.S.A. | GBIF 2021 | 44.22539          | -72.46075          |
| 1232 | U.S.A. | GBIF 2021 | 44.23544          | -73.23192          |
| 1233 | U.S.A. | GBIF 2021 | 44.2387639        | -72.1160864        |
| 1234 | U.S.A. | GBIF 2021 | 44.2608708        | -83.5308485        |
| 1235 | U.S.A. | GBIF 2021 | 44.2652911        | -83.5241276        |
| 1236 | U.S.A. | GBIF 2021 | 44.2705854        | -71.3032723        |
| 1237 | U.S.A. | GBIF 2021 | 44.27183          | -72.45511          |
| 1238 | U.S.A. | GBIF 2021 | 44.2724599        | -83.5238186        |
| 1239 | U.S.A. | GBIF 2021 | 44.2758183        | -103.6663058       |
| 1240 | U.S.A. | GBIF 2021 | 44.2762584        | -84.2426027        |
| 1241 | U.S.A. | GBIF 2021 | 44.2773002        | -84.2429985        |
| 1242 | U.S.A. | GBIF 2021 | 44.27769          | -73.22229          |
| 1243 | U.S.A. | GBIF 2021 | 44.29596          | -72.69902          |
| 1244 | U.S.A. | GBIF 2021 | 44.2983365        | -84.725468         |
| 1245 | U.S.A. | GBIF 2021 | 44.2994           | -72.68952          |
| 1246 | U.S.A. | GBIF 2021 | 44.3099922        | -85.2157263        |
| 1247 | U.S.A. | GBIF 2021 | 44.3148443        | -85.6023643        |
| 1248 | U.S.A. | GBIF 2021 | 44.3156512        | -68.2106314        |
| 1249 | U.S.A. | GBIF 2021 | 44.31587          | -72.72574          |
| 1250 | U.S.A. | GBIF 2021 | 44.3197           | -73.02746          |
| 1251 | U.S.A. | GBIF 2021 | 44.32013          | -73.03067          |
| 1252 | U.S.A. | GBIF 2021 | 44.32131          | -73.02989          |
| 1253 | U.S.A. | GBIF 2021 | 44.335606         | -84.611596         |
| 1254 | U.S.A. | GBIF 2021 | 44.34283          | -72.71084          |
| 1255 | U.S.A. | GBIF 2021 | 44.36449          | -72.29657          |
| 1256 | U.S.A. | GBIF 2021 | 44.36578          | -72.91032          |
| 1257 | U.S.A. | GBIF 2021 | 44.376651         | -103.7296415       |
| 1258 | U.S.A. | GBIF 2021 | 44.3947279990569  | -84.388147         |
| 1259 | U.S.A. | GBIF 2021 | 44.39472799905694 | -84.38814700000002 |
| 1260 | U.S.A. | GBIF 2021 | 44.4097069        | -103.5090786       |
| 1261 | U.S.A. | GBIF 2021 | 44.4158589        | -83.3355716        |
| 1262 | U.S.A. | GBIF 2021 | 44.4192627        | -72.0151184        |
| 1263 | U.S.A. | GBIF 2021 | 44.4248597        | -83.3302225        |
| 1264 | U.S.A. | GBIF 2021 | 44.4330696        | -68.9953595        |
| 1265 | U.S.A. | GBIF 2021 | 44.4439565        | -83.365456         |
| 1266 | U.S.A. | GBIF 2021 | 44.44446          | -73.99958          |
| 1267 | U.S.A. | GBIF 2021 | 44.4459           | -72.65897          |

|      |        |           |                    |                    |
|------|--------|-----------|--------------------|--------------------|
| 1268 | U.S.A. | GBIF 2021 | 44.4464699         | -84.3121264        |
| 1269 | U.S.A. | GBIF 2021 | 44.4544949990569   | -84.542523         |
| 1270 | U.S.A. | GBIF 2021 | 44.454494999056905 | -84.542523         |
| 1271 | U.S.A. | GBIF 2021 | 44.4552259990569   | -85.936307         |
| 1272 | U.S.A. | GBIF 2021 | 44.45522599905692  | -85.936307         |
| 1273 | U.S.A. | GBIF 2021 | 44.4610952         | -103.6385276       |
| 1274 | U.S.A. | GBIF 2021 | 44.4616799990569   | -86.080339         |
| 1275 | U.S.A. | GBIF 2021 | 44.461679999056905 | -86.080339         |
| 1276 | U.S.A. | GBIF 2021 | 44.46168           | -86.089339         |
| 1277 | U.S.A. | GBIF 2021 | 44.4635439990569   | -83.29461          |
| 1278 | U.S.A. | GBIF 2021 | 44.4635439990569   | -84.29461          |
| 1279 | U.S.A. | GBIF 2021 | 44.46354399905691  | -83.29461          |
| 1280 | U.S.A. | GBIF 2021 | 44.46354399905691  | -84.29460999999999 |
| 1281 | U.S.A. | GBIF 2021 | 44.474833          | -85.603532         |
| 1282 | U.S.A. | GBIF 2021 | 44.48431           | -72.49857          |
| 1283 | U.S.A. | GBIF 2021 | 44.4941037         | -86.2307766        |
| 1284 | U.S.A. | GBIF 2021 | 44.4983504         | -84.5919682        |
| 1285 | U.S.A. | GBIF 2021 | 44.49944           | -73.04027          |
| 1286 | U.S.A. | GBIF 2021 | 44.5000397         | -84.5907198        |
| 1287 | U.S.A. | GBIF 2021 | 44.51129           | -71.91502          |
| 1288 | U.S.A. | GBIF 2021 | 44.52602699905688  | -84.745711         |
| 1289 | U.S.A. | GBIF 2021 | 44.5260269990569   | -84.745711         |
| 1290 | U.S.A. | GBIF 2021 | 44.526027          | -84.75711          |
| 1291 | U.S.A. | GBIF 2021 | 44.526027          | -84.757111         |
| 1292 | U.S.A. | GBIF 2021 | 44.5364238         | -70.3556598        |
| 1293 | U.S.A. | GBIF 2021 | 44.539417999056866 | -84.872087         |
| 1294 | U.S.A. | GBIF 2021 | 44.5394179990569   | -84.872087         |
| 1295 | U.S.A. | GBIF 2021 | 44.5588028         | -72.5778415        |
| 1296 | U.S.A. | GBIF 2021 | 44.56652           | -72.9418           |
| 1297 | U.S.A. | GBIF 2021 | 44.567888          | -86.019086         |
| 1298 | U.S.A. | GBIF 2021 | 44.61336           | -73.21421          |
| 1299 | U.S.A. | GBIF 2021 | 44.63577           | -73.30064          |
| 1300 | U.S.A. | GBIF 2021 | 44.64373           | -72.72161          |
| 1301 | U.S.A. | GBIF 2021 | 44.6524316         | -84.6897495        |
| 1302 | U.S.A. | GBIF 2021 | 44.65409           | -72.96196          |
| 1303 | U.S.A. | GBIF 2021 | 44.65454           | -72.90894          |
| 1304 | U.S.A. | GBIF 2021 | 44.66898           | -72.99669          |
| 1305 | U.S.A. | GBIF 2021 | 44.678277          | -86.2970998        |
| 1306 | U.S.A. | GBIF 2021 | 44.6863833         | -85.5568861        |
| 1307 | U.S.A. | GBIF 2021 | 44.6870073         | -85.3294831        |
| 1308 | U.S.A. | GBIF 2021 | 44.68776           | -73.29413          |



|      |        |           |                    |                    |
|------|--------|-----------|--------------------|--------------------|
| 1309 | U.S.A. | GBIF 2021 | 44.7111            | -72.36617          |
| 1310 | U.S.A. | GBIF 2021 | 44.7139364         | -84.7011188        |
| 1311 | U.S.A. | GBIF 2021 | 44.7156622         | -85.5574369        |
| 1312 | U.S.A. | GBIF 2021 | 44.71882           | -72.51646          |
| 1313 | U.S.A. | GBIF 2021 | 44.7214301         | -73.7237528        |
| 1314 | U.S.A. | GBIF 2021 | 44.7440729990568   | -85.424528         |
| 1315 | U.S.A. | GBIF 2021 | 44.748611          | -84.633333         |
| 1316 | U.S.A. | GBIF 2021 | 44.76450599905678  | -84.26343          |
| 1317 | U.S.A. | GBIF 2021 | 44.7645059990568   | -84.26343          |
| 1318 | U.S.A. | GBIF 2021 | 44.77316           | -72.80883          |
| 1319 | U.S.A. | GBIF 2021 | 44.78578599905679  | -85.992548         |
| 1320 | U.S.A. | GBIF 2021 | 44.7857859990568   | -85.992548         |
| 1321 | U.S.A. | GBIF 2021 | 44.847913          | -83.345955         |
| 1322 | U.S.A. | GBIF 2021 | 44.8551            | -73.08086          |
| 1323 | U.S.A. | GBIF 2021 | 44.86454           | -73.26442          |
| 1324 | U.S.A. | GBIF 2021 | 44.87568           | -73.32529          |
| 1325 | U.S.A. | GBIF 2021 | 44.88568           | -73.28427          |
| 1326 | U.S.A. | GBIF 2021 | 44.90088           | -72.9725           |
| 1327 | U.S.A. | GBIF 2021 | 44.90447           | -72.67436          |
| 1328 | U.S.A. | GBIF 2021 | 44.91796           | -85.103202         |
| 1329 | U.S.A. | GBIF 2021 | 44.9592231         | -70.1539542        |
| 1330 | U.S.A. | GBIF 2021 | 45.0511571         | -71.3914688        |
| 1331 | U.S.A. | GBIF 2021 | 45.0521793         | -84.485094         |
| 1332 | U.S.A. | GBIF 2021 | 45.0742794         | -84.1403141        |
| 1333 | U.S.A. | GBIF 2021 | 45.0821226         | -85.0733634        |
| 1334 | U.S.A. | GBIF 2021 | 45.1072257         | -85.3500727        |
| 1335 | U.S.A. | GBIF 2021 | 45.14143399905678  | -85.375467         |
| 1336 | U.S.A. | GBIF 2021 | 45.1414339990568   | -85.375467         |
| 1337 | U.S.A. | GBIF 2021 | 45.1639639990568   | -84.178205         |
| 1338 | U.S.A. | GBIF 2021 | 45.2009999990568   | -85.08026          |
| 1339 | U.S.A. | GBIF 2021 | 45.200999999056805 | -85.08026          |
| 1340 | U.S.A. | GBIF 2021 | 45.2203039990568   | -84.361401         |
| 1341 | U.S.A. | GBIF 2021 | 45.22030399905681  | -84.361401         |
| 1342 | U.S.A. | GBIF 2021 | 45.220304          | -84.361401         |
| 1343 | U.S.A. | GBIF 2021 | 45.253783          | -69.4454689        |
| 1344 | U.S.A. | GBIF 2021 | 45.2819607         | -83.4658332        |
| 1345 | U.S.A. | GBIF 2021 | 45.3040825         | -83.478521         |
| 1346 | U.S.A. | GBIF 2021 | 45.3180632         | -85.2584004        |
| 1347 | U.S.A. | GBIF 2021 | 45.5370436         | -84.3786623        |
| 1348 | U.S.A. | GBIF 2021 | 45.595361999057    | -84.346471         |
| 1349 | U.S.A. | GBIF 2021 | 45.595361999057005 | -84.34647100000001 |

|      |                |                   |                   |              |
|------|----------------|-------------------|-------------------|--------------|
| 1350 | U.S.A.         | GBIF 2021         | 45.6469563        | -84.4744795  |
| 1351 | U.S.A.         | GBIF 2021         | 45.7832856        | -108.5006904 |
| 1352 | U.S.A.         | GBIF 2021         | 45.8683129        | -84.6275658  |
| 1353 | U.S.A.         | GBIF 2021         | 45.998939         | -85.009401   |
| 1354 | U.S.A.         | GBIF 2021         | 46.328183         | -84.529364   |
| 1355 | U.S.A.         | GBIF 2021         | 46.3483626        | -94.2686378  |
| 1356 | U.S.A.         | GBIF 2021         | 46.3825449990579  | -85.992962   |
| 1357 | U.S.A.         | GBIF 2021         | 46.38254499905794 | -85.992962   |
| 1358 | U.S.A.         | GBIF 2021         | 46.3957881        | -84.3971111  |
| 1359 | U.S.A.         | GBIF 2021         | 46.4877376        | -84.3971717  |
| 1360 | U.S.A.         | GBIF 2021         | 46.497017         | -85.569613   |
| 1361 | U.S.A.         | GBIF 2021         | 46.5330129        | -93.7102493  |
| 1362 | U.S.A.         | GBIF 2021         | 46.5475825        | -87.3955954  |
| 1363 | U.S.A.         | GBIF 2021         | 46.591366         | -88.881962   |
| 1364 | U.S.A.         | GBIF 2021         | 46.7217735        | -92.4611825  |
| 1365 | U.S.A.         | GBIF 2021         | 46.986154         | -68.031693   |
| 1366 | U.S.A.         | GBIF 2021         | 47.1163463        | -88.5625509  |
| 1367 | U.S.A.         | GBIF 2021         | 47.2171841        | -95.2048162  |
| 1368 | U.S.A.         | GBIF 2021         | 48.216686         | -101.540535  |
| 1369 | United Kingdom | Inward 2020       | 50.880000         | -1.830000    |
| 1370 | United Kingdom | Inward 2020       | 50.920000         | -1.630000    |
| 1371 | United Kingdom | Inward 2020       | 50.930000         | -1.650000    |
| 1372 | United Kingdom | Inward 2020       | 51.130000         | -1.030000    |
| 1373 | United Kingdom | Inward 2020       | 51.330000         | -0.890000    |
| 1374 | United Kingdom | Inward 2020       | 51.390000         | -1.610000    |
| 1375 | United Kingdom | Inward 2020       | 53.470000         | -0.740000    |
| 1376 | Poland         | Mazur et al. 2018 | 50.4553           | 16.2779      |
| 1377 | Poland         | Mazur et al. 2018 | 50.7245           | 15.8407      |
| 1378 | Poland         | Mazur et al. 2018 | 50.7498           | 15.8755      |
| 1379 | Poland         | Mazur et al. 2018 | 50.7602           | 15.9364      |
| 1380 | Poland         | Mazur et al. 2018 | 50.7979           | 15.5880      |
| 1381 | Poland         | Mazur et al. 2018 | 50.7993           | 15.9990      |
| 1382 | Poland         | Mazur et al. 2018 | 50.9988           | 15.2161      |
| 1383 | Poland         | Mazur et al. 2018 | 51.2444           | 15.1633      |
| 1384 | Poland         | Mazur et al. 2018 | 51.2813           | 15.1007      |
| 1385 | Poland         | Mazur et al. 2018 | 51.2857           | 15.2859      |
| 1386 | Poland         | Mazur et al. 2018 | 51.3022           | 15.319400    |
| 1387 | Poland         | Mazur et al. 2018 | 51.3401           | 15.2667      |
| 1388 | Poland         | Mazur et al. 2018 | 51.3441           | 15.1082      |
| 1389 | Poland         | Mazur et al. 2018 | 51.3456           | 15.1362      |
| 1390 | Poland         | Mazur et al. 2018 | 51.4192           | 15.1647      |

|      |        |               |                  |                  |
|------|--------|---------------|------------------|------------------|
| 1391 | Poland | in this study | 50.089092        | 15.300938        |
| 1392 | Poland | in this study | 50.6777793997222 | 16.0355454       |
| 1393 | Poland | in this study | 50.6778441       | 16.0356306997222 |
| 1394 | Poland | in this study | 50.6778638997222 | 16.0356349       |
| 1395 | Poland | in this study | 50.70764         | 16.026342        |
| 1396 | Poland | in this study | 50.7276          | 16.0213          |
| 1397 | Poland | in this study | 50.729638        | 16.033111        |
| 1398 | Poland | in this study | 50.7340318997222 | 16.033794        |
| 1399 | Poland | in this study | 50.7340500997222 | 16.0338017997222 |
| 1400 | Poland | in this study | 50.7341131       | 16.0338178       |
| 1401 | Poland | in this study | 50.7371          | 16.0475          |
| 1402 | Poland | in this study | 50.7379336997222 | 16.0455554997222 |
| 1403 | Poland | in this study | 50.7379338       | 16.0455556       |
| 1404 | Poland | in this study | 50.738129        | 16.0456871997222 |
| 1405 | Poland | in this study | 50.7381409997222 | 16.0458187997222 |
| 1406 | Poland | in this study | 50.7383333333333 | 16.0458333333333 |
| 1407 | Poland | in this study | 50.7383558       | 16.0457475997222 |
| 1408 | Poland | in this study | 50.7383614       | 16.0457606       |
| 1409 | Poland | in this study | 50.7383805997222 | 16.0457779       |
| 1410 | Poland | in this study | 50.7383872997222 | 16.0458056       |
| 1411 | Poland | in this study | 50.7383887       | 16.0457762997222 |
| 1412 | Poland | in this study | 50.747692        | 15.854125        |
| 1413 | Poland | in this study | 50.7477777777778 | 15.8538888888889 |
| 1414 | Poland | in this study | 50.7477777777778 | 15.8541666666667 |
| 1415 | Poland | in this study | 50.7736337997222 | 15.9521457       |
| 1416 | Poland | in this study | 50.8183256       | 15.9731869997222 |
| 1417 | Poland | in this study | 50.8183365       | 15.9731869997222 |
| 1418 | Poland | in this study | 50.8183411997222 | 15.9731039997222 |
| 1419 | Poland | in this study | 50.8183428997222 | 15.9731769       |
| 1420 | Poland | in this study | 50.8183452997222 | 15.9731942997222 |
| 1421 | Poland | in this study | 50.8183454997222 | 15.9731854997222 |
| 1422 | Poland | in this study | 50.8183494997222 | 15.9731270997222 |
| 1423 | Poland | in this study | 50.8183566       | 15.9730896997222 |
| 1424 | Poland | in this study | 50.8213          | 15.9814          |
| 1425 | Poland | in this study | 50.823709937     | 16.067893416     |
| 1426 | Poland | in this study | 50.827076        | 16.06773         |
| 1427 | Poland | in this study | 50.827914        | 16.075053        |
| 1428 | Poland | in this study | 50.8724          | 15.8913          |
| 1429 | Poland | in this study | 51.0150          | 16.0239          |
| 1430 | Poland | in this study | 51.0771          | 15.9184          |
| 1431 | Poland | in this study | 51.0894          | 15.2552          |

|      |        |                     |                  |                  |
|------|--------|---------------------|------------------|------------------|
| 1432 | Poland | in this study       | 51.1051          | 15.4597          |
| 1433 | Poland | in this study       | 51.1688          | 15.8174          |
| 1434 | Poland | in this study       | 51.1792          | 15.5889          |
| 1435 | Poland | in this study       | 51.2437          | 15.1710          |
| 1436 | Poland | in this study       | 51.284122        | 15.288606        |
| 1437 | Poland | in this study       | 51.2841666666667 | 15.2886111111111 |
| 1438 | Poland | in this study       | 51.2963888888889 | 15.1833333333333 |
| 1439 | Poland | in this study       | 51.2966666666667 | 15.1830555555556 |
| 1440 | Poland | in this study       | 51.2966666666667 | 15.1833333333333 |
| 1441 | Poland | in this study       | 51.2966666666667 | 15.1836111111111 |
| 1442 | Poland | in this study       | 51.296767        | 15.182936        |
| 1443 | Poland | in this study       | 51.2969444444444 | 15.1836111111111 |
| 1444 | Poland | Szołtys et al. 2019 | 50.223927        | 18.888094        |
| 1445 | Poland | Szołtys et al. 2019 | 50.237763        | 18.886732        |
| 1446 | Poland | Szołtys et al. 2019 | 50.239685        | 18.928138        |
| 1447 | Poland | Szołtys et al. 2019 | 51.5010          | 15.9557          |
| 1448 | Poland | Szołtys et al. 2019 | 51.501700        | 15.955800        |

### Direct sources of the data used in modelling

- Atkinson, T.H. Bark and Ambrosia Beetles. Available online: [https://www.barkbeetles.info/regional\\_chklist\\_target\\_species.php?lookUp=3080#table](https://www.barkbeetles.info/regional_chklist_target_species.php?lookUp=3080#table) (accessed on 23 November 2018).
- Bernabo, E. Osservazione sulla presenza in Italia di *Xylosandrus germanus* (Blandford, 1894) e *Gnathotrichus materiarius* (Fitch, 1858)(Coleoptera: Scolytidae). Riv. Piemont. Di Stor. Nat. 2000, 21, 255–262.
- Bleich, O.; Gürlich, S.; Köhler, F. Verzeichnis und Verbreitungsatlas der Käfer Deutschlands. Available online: <http://www.coleoweb.de/> (accessed on 19 June 2019).
- GBIF. GBIF Occurrence download for *Gnathotrichus materiarius* Fitch. Retrieved from Global Biodiversity Information Facility. Available online: <https://doi.org/10.15468/dl.3yenre> (accessed on 2 February 2021).
- Inward, D.J.G. Three new species of ambrosia beetles established in Great Britain illustrate unresolved risks from imported wood. J. Pest Sci. 2020, 93, 117–126, <https://doi.org/10.1007/s10340-019-01137-1>.
- Mazur, A.; Witkowski, R.; Góral, J.; Rogowski, G. Occurrence of *Gnathotrichus materiarius* (Fitch, 1858) (Coleoptera, Curculionidae, Scolytinae) in South-Western Poland. Folia For. Pol. 2018, 60, 154–160, <https://doi.org/10.2478/ffp-2018-0015>.

Witkowski, R.; Góral, J.; Nowik, K.; Rogowski, G.; Skąlecka, K.; Mazur, A. *Gnathotrichus materiarius* (Fitch, 1858) (Coleoptera: Curculionidae, Scolytinae) new species of beetle in the Polish fauna. *Acta Sci. Pol. Silv. Colendar. Ratio Ind. Lignar.* 2016, 15, 43–47, <https://doi.org/10.17306/J.AFW.2016.1.6>.

### Sources included in used datasets

Atkinson, T.H.; Rabaglia, R.J.; Peck, S.B.; Foltz, J.L. New records of Scolytidae and Platypodidae (Coleoptera) from the United States and the Bahamas. *The Coleopterists' Bull.* **1991**, 45(2), 152–164.

Coyle, D.R.; Booth, D.C.; Wallace, M.S. Ambrosia beetle (Coleoptera: Scolytidae) species, flight, and attack on living eastern cottonwood trees. *J. Econ. Ent.* **2005**, 98(6), 2049–2057.

Dodge, H.R. The bark beetles of Minnesota (Coleoptera: Scolytidae). *Univ. Minn. Agric. Exp. Sta. Tech. Bull.* **1938**, 132, 1–66.

Goldarazena, A.; Bright, D.E.; Hishinuma, S.M.; López, S.; Seybold, S.J. First record of *Pityophthorus solus* (Blackman, 1928) in Europe. *EPPO Bull.* **2014**, 44(1), 65–69.

Helm, C.; Molano-Flores, B. New records of native and non-native bark and ambrosia beetles (Coleoptera: Curculionidae: Scolytinae) in Illinois. *Great Lakes Entomol.* **2015**, 48(3), 137–149.

Hines, J.W.; Heikkinen, H.J. Beetles attracted to severed Virginia pine (*Pinus virginiana* Mill.). *Environ. Entomol.* **1977**, 6(1), 123–127.

LaBonte, J.R.; Mudge, A.D.; Johnson, K.J.R. Nonindigenous woodboring Coleoptera (Cerambycidae, Curculionidae: Scolytinae) new to Oregon and Washington, 1999–2002: consequences of the intracontinental movement of raw wood products and solid wood packing materials. *Proc. Ent. Soc. Wash.* 2005, 107(3), 554–564.

Mudge, A.D.; LaBonte, J.R.; Johnson, K.J.R.; LaGasa, E.H. Exotic woodboring Coleoptera (Micromalthidae, Scolytidae) and Hymenoptera (Xiphydriidae) new to Oregon and Washington. *Proc. Ent. Soc. Wash.*, **2001**, 103(4), 1011–1019.

Oliver, J.B.; Mannion, C.M. Ambrosia beetle (Coleoptera: Scolytidae) species attacking chestnut and captured in ethanol-baited traps in middle Tennessee. *Environ. Entomol.*, **2001**, 30(5), 909–918.

- Rabaglia, R.J.; Valenti, M.A. Annotated list of the bark and ambrosia beetles (Coleoptera: Scolytidae) of Delaware, with new distribution records. *Proc. Entomol. Soc. Wash.* **2003**, *105*(2), 312–319.
- Reed, S.E.; Muzika, R.M. The influence of forest stand and site characteristics on the composition of exotic dominated ambrosia beetle communities (Coleoptera: Curculionidae: Scolytinae). *Environ. Entomol.* **2010**, *39*(5), 1482–1491.
- Roeper, R.A.; Hazen, C.R.; Helsel, D.K.; Bunce, M.A. Studies on Michigan ambrosia fungi. *Michigan Bot.* **1980**, *19*, 69–73.
- Weber, B.C.; MacPherson, J.E. Seasonal Flight Patterns Of Scolytidae (Coleoptera) In Black-Walnut Plantations In North-Carolina And Illinois. *Coleopterists Bull.* **1991**, *45*(1): 4556.
- Wood, S.L. The bark and ambrosia beetles of North and Central America (Coleoptera: Scolytidae), a taxonomic monograph. Great Basin Nat. Mem. 6, Brigham Young University, Provo, Utah, USA, 1982; pp. 1–1356.
- Wood, S.L.; Bright, D.E. A catalog of Scolytidae and Platypodidae (Coleoptera), Part 2. Taxonomic Index (Volumes A, B). Great Basin Nat. Mem. 13, Brigham Young University, Provo, Utah, USA, 1992; pp. 1–1553.
